# Supplementary material for: Dual Antibacterial Activities and Biofilm Eradication of a Marine Peptide-N6NH2 and Its Analogs against Multidrug-Resistant Aeromonas veronii
Source: PubMed Central journal article supplement (PMC7767178; doi:10.3390/ijms21249637), 2020-12-17
Supplement: ijms-21-09637-s001.pdf [file ijms-21-09637-s001.pdf]

# SUPPLEMENTARY DATA

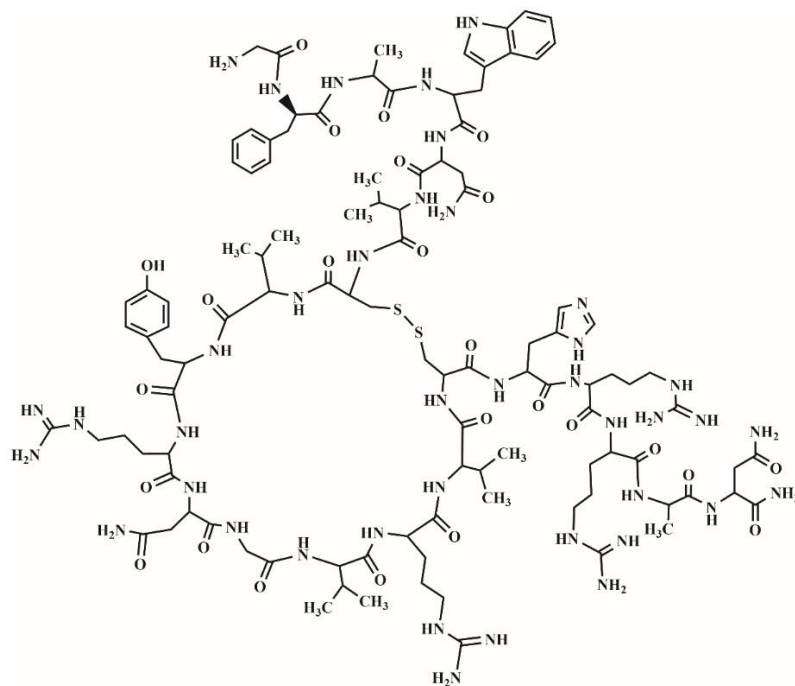

Figure S1-1. The chemical structure of N6NH<sub>2</sub>.

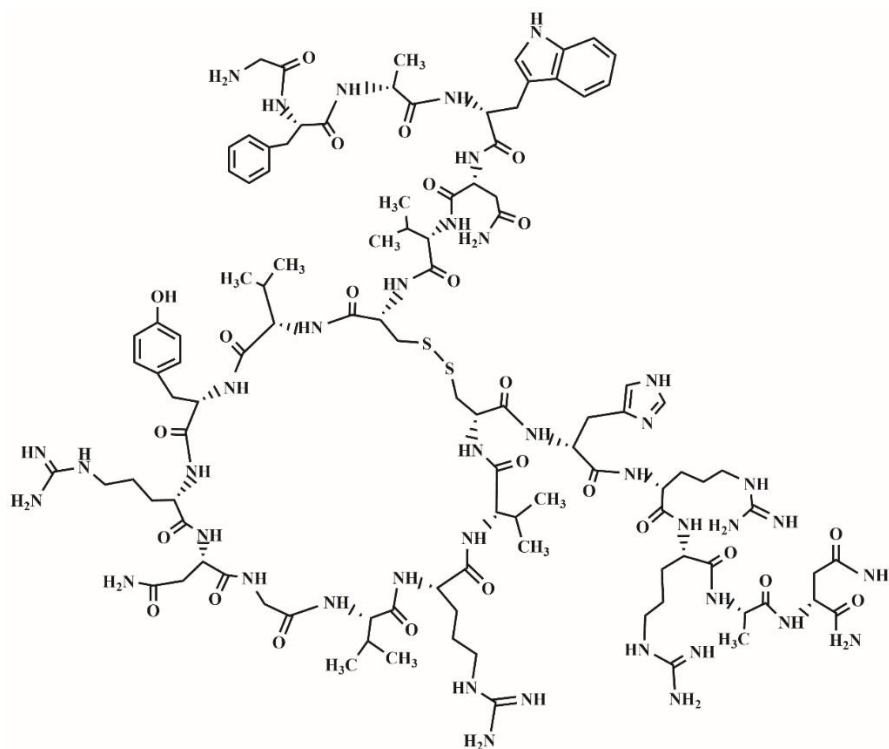

Figure S1-2. The chemical structure of DN6NH<sub>2</sub>.

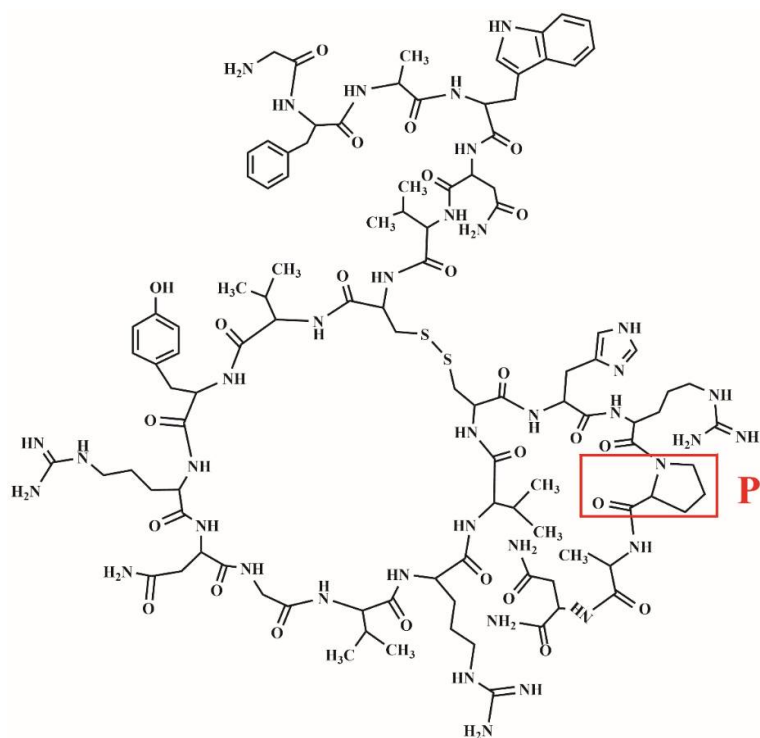

**Figure S1-3.** The chemical structure of N6PNH<sub>2</sub>. The red circle represents the position of amino acid replacement group.

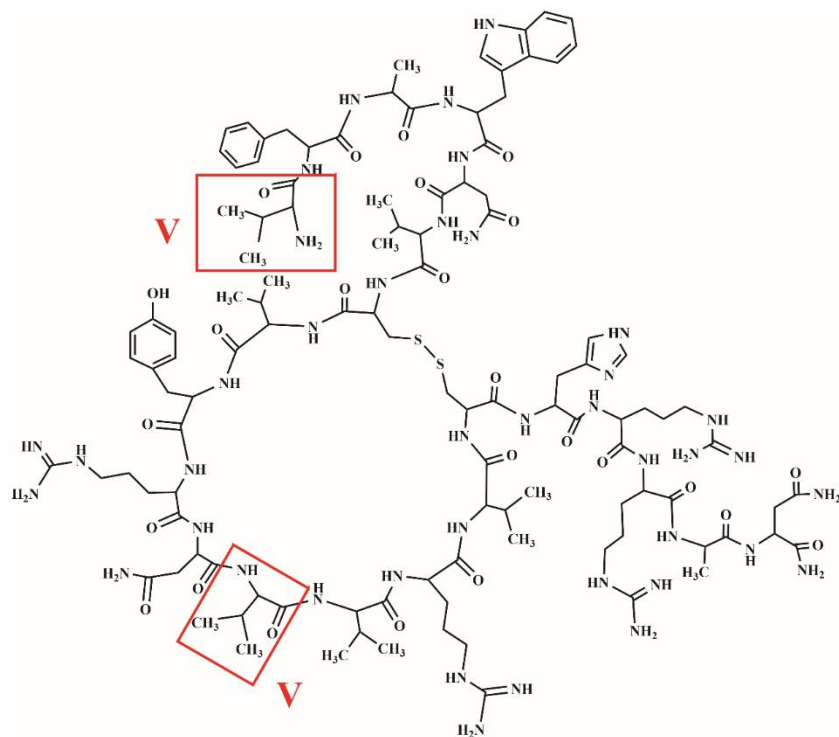

**Figure S1-4.** The chemical structure of V112N6NH<sub>2</sub>. The red circle represents the position of amino acid replacement group.

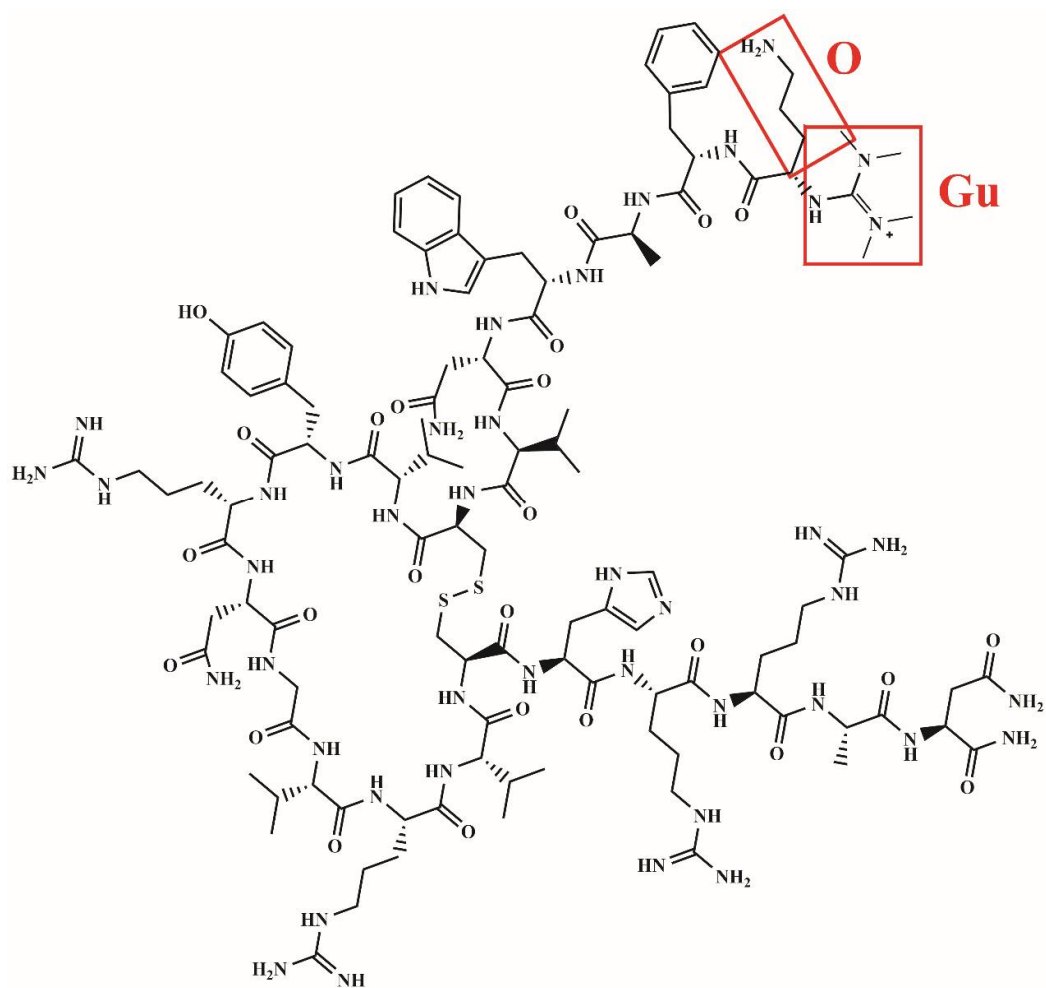

**Figure S1-5.** The chemical structure of Guo-N6NH<sub>2</sub>. The red circle represents the position of amino acid added group.

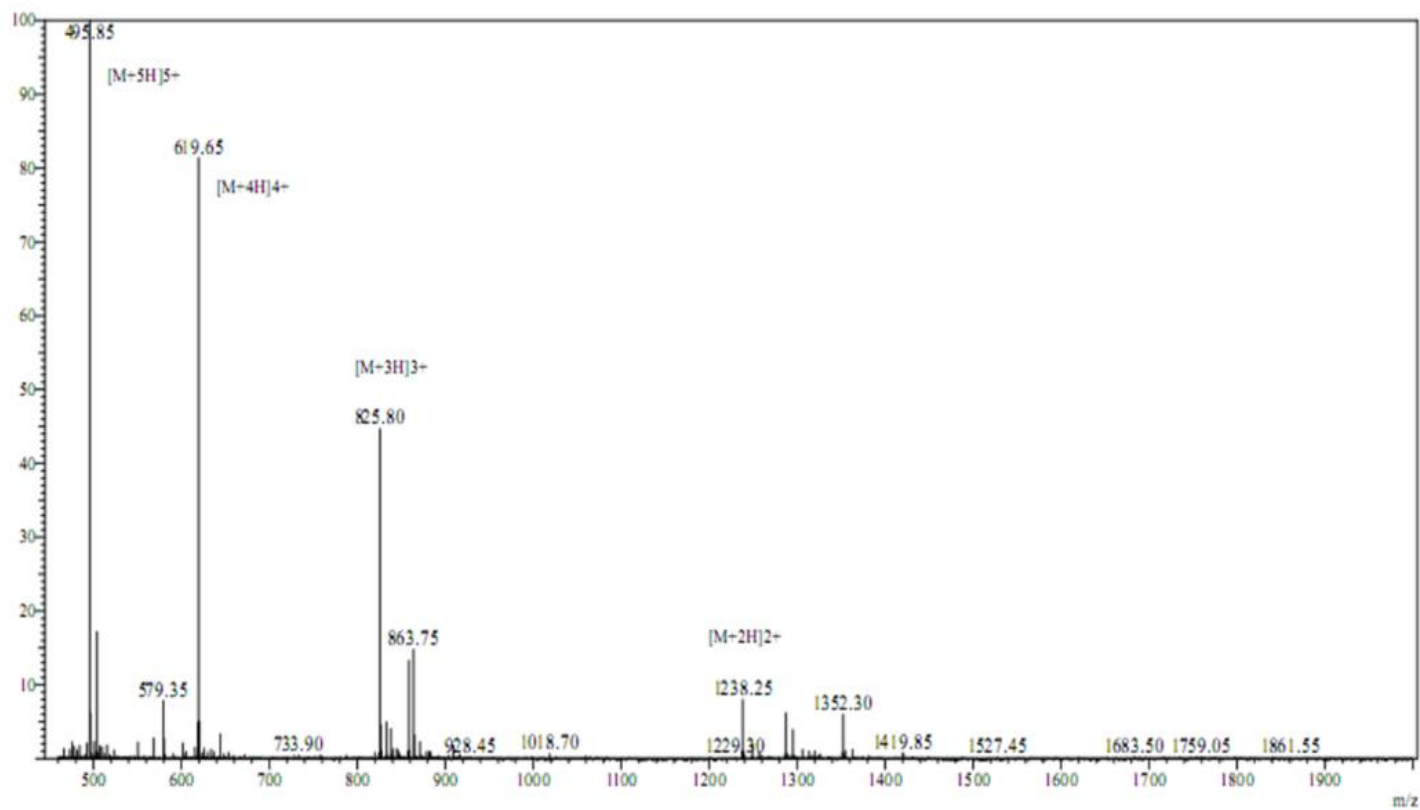

Figure S2-1. The mass spectrometry (MS) analysis of N6NH<sub>2</sub>.

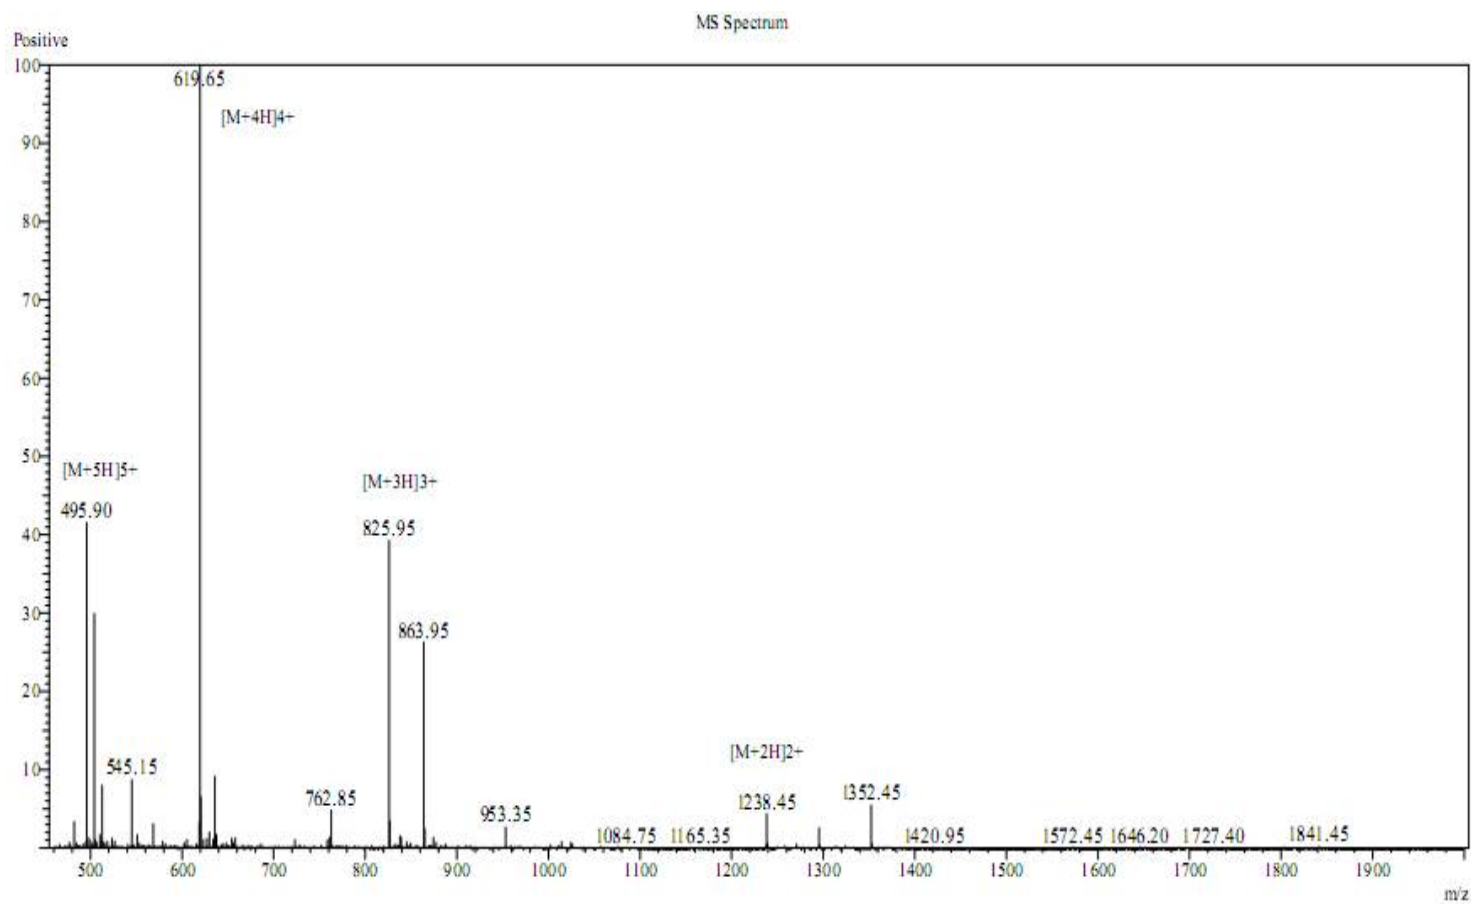

Figure S2-2. The mass spectrometry (MS) analysis of DN6NH<sub>2</sub>.

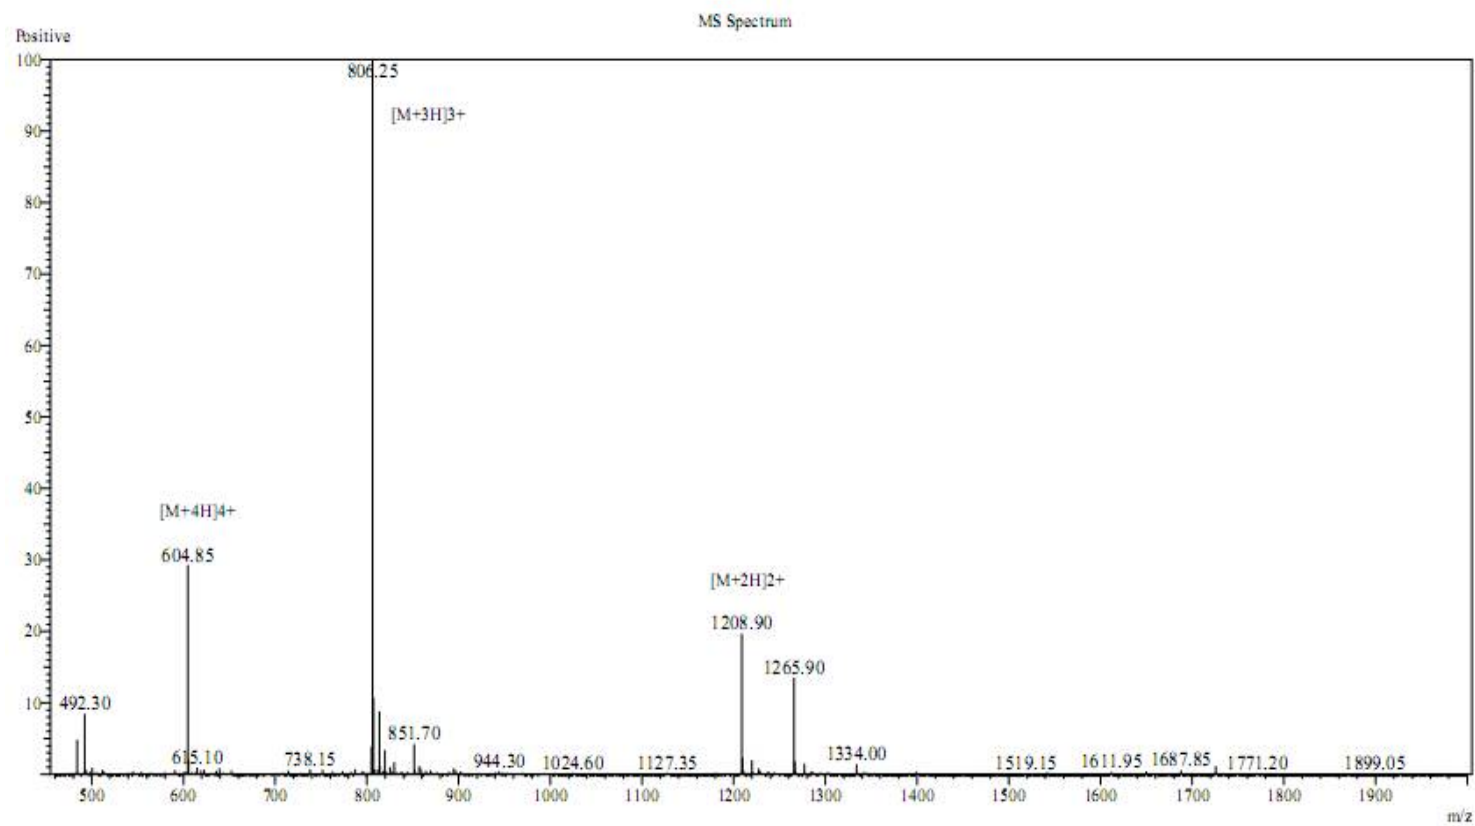

Figure S2-3. The mass spectrometry (MS) analysis of N6PNH<sub>2</sub>.

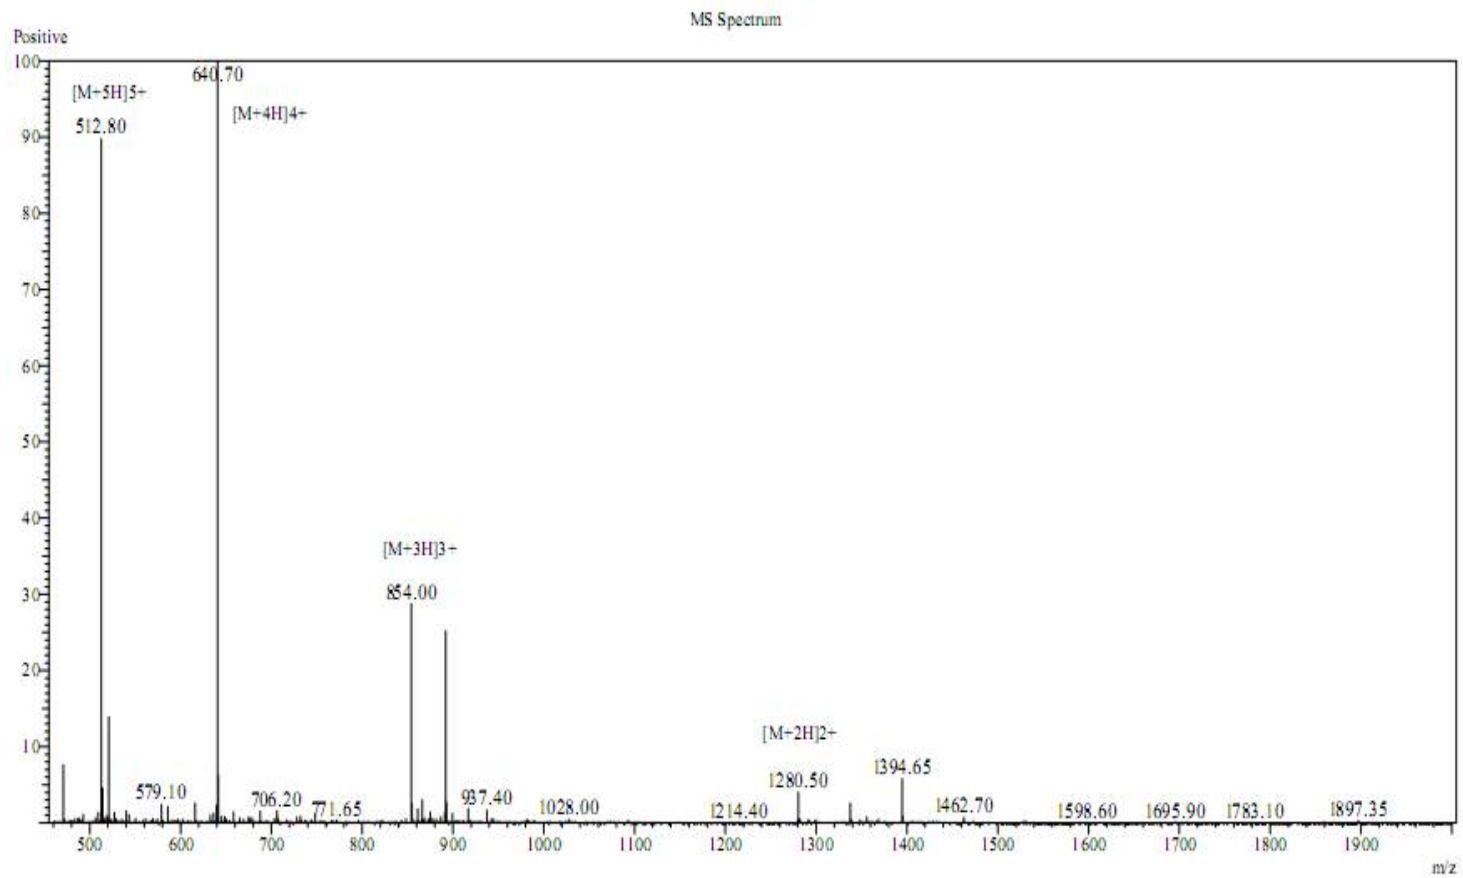

Figure S2-4. The mass spectrometry (MS) analysis of V112N6NH<sub>2</sub>.

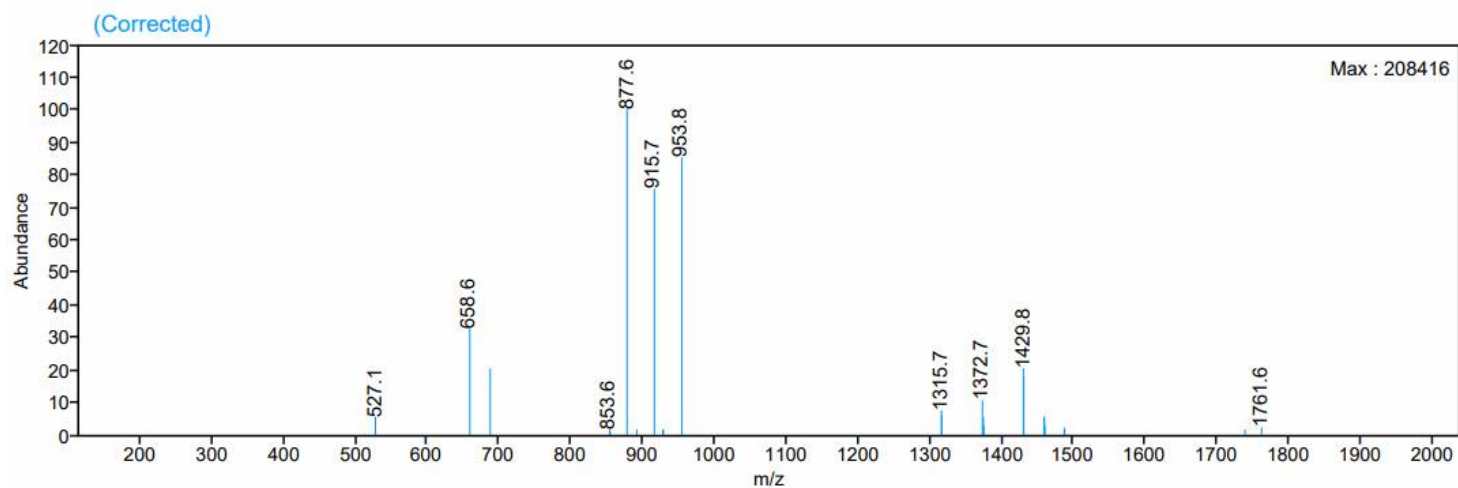

Figure S2-5. The mass spectrometry (MS) analysis of Guo-N6NH<sub>2</sub>.



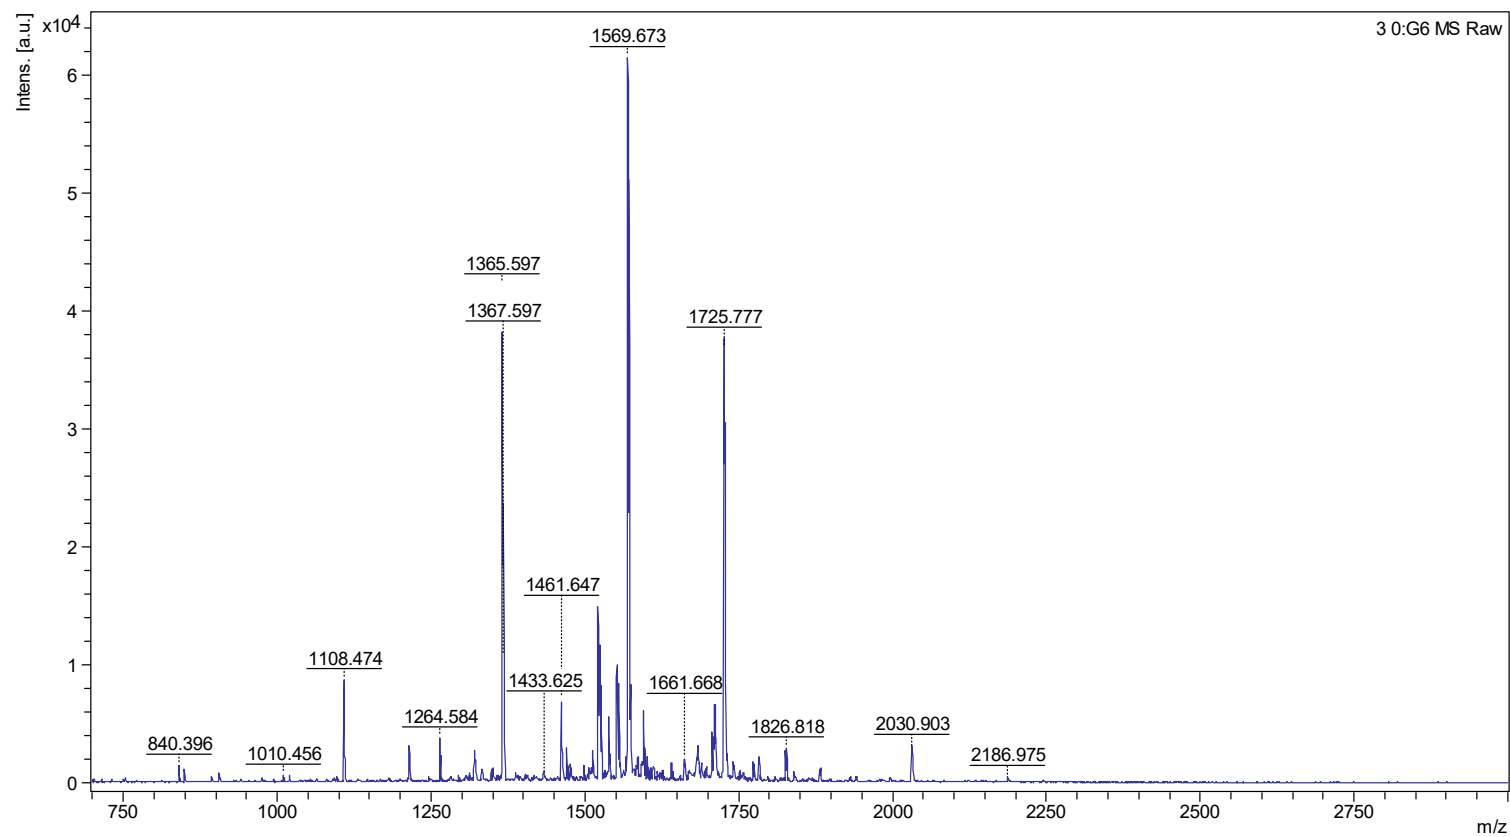

**Figure S3.** The mass spectrometry (MS) analysis of N6NH<sub>2</sub> treated by trypsin. It was confirmed by MALDI-TOF MS (Ultraflextreme, Bruker, Germany) at the Laboratory of Proteomics, Institute of Biophysics, Chinese Academy of Sciences.

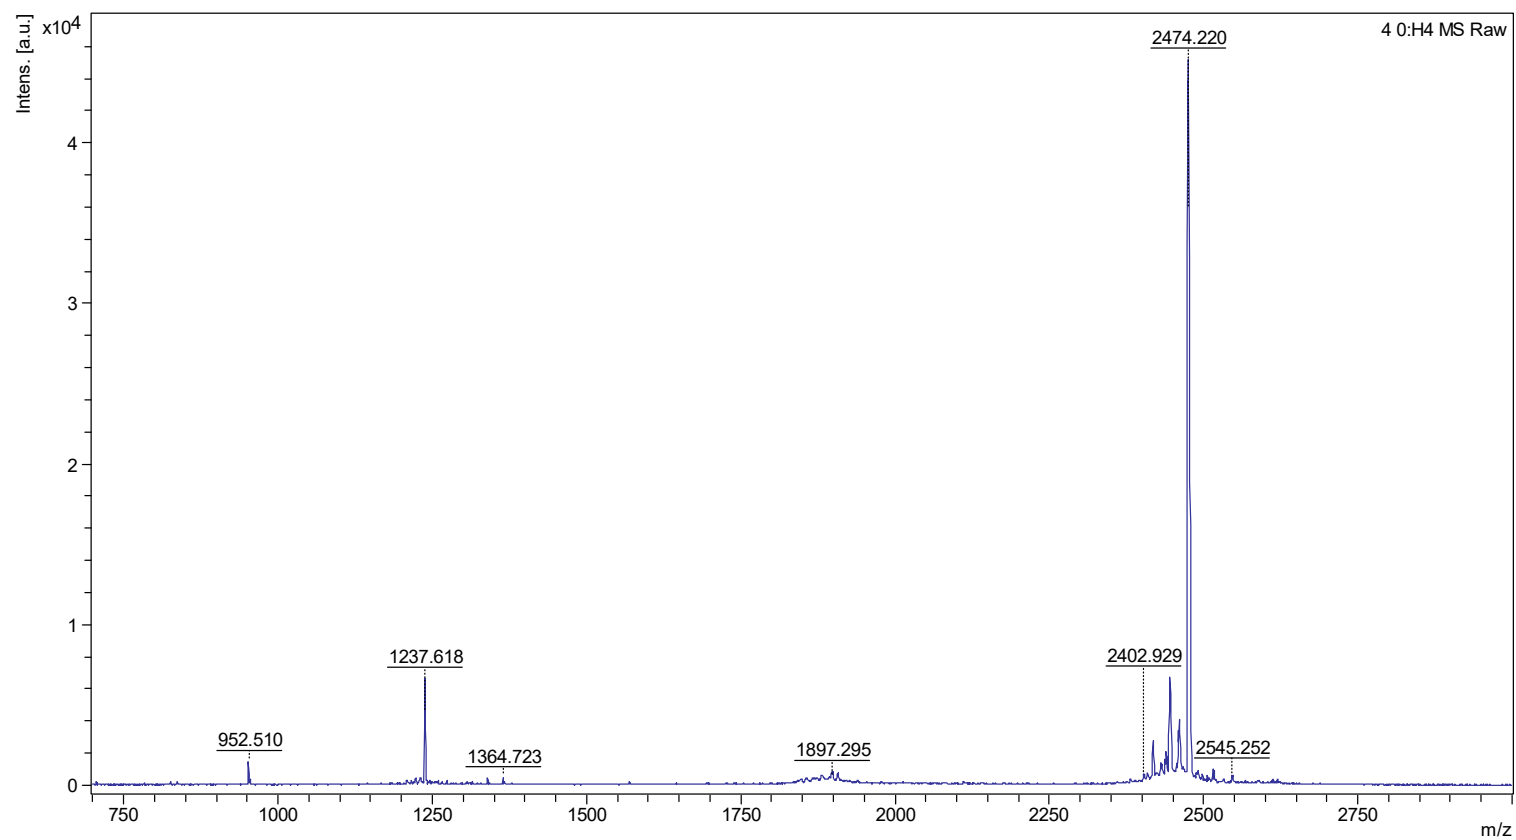

**Figure S4.** The MS analysis of DN6NH<sub>2</sub> treated by trypsin. It was confirmed by MALDI-TOF MS (Ultraflexextreme, Bruker, Germany) at the Laboratory of Proteomics, Institute of Biophysics, Chinese Academy of Sciences.

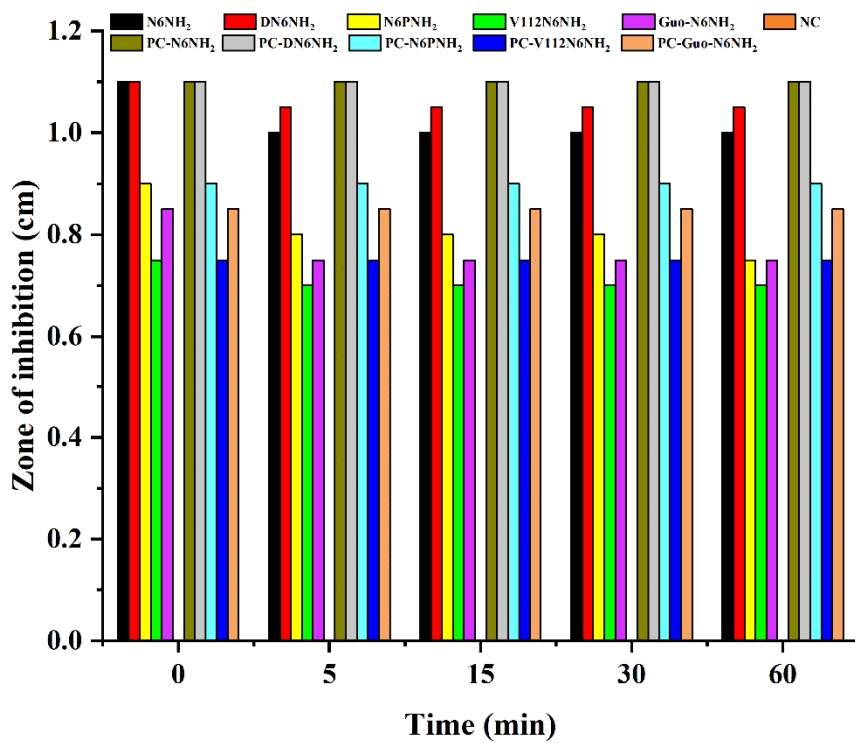

**Figure S5.** The stability of N6NH<sub>2</sub> analogues in simulated gastric fluid (SGF). NC, negative control; PC, positive control.

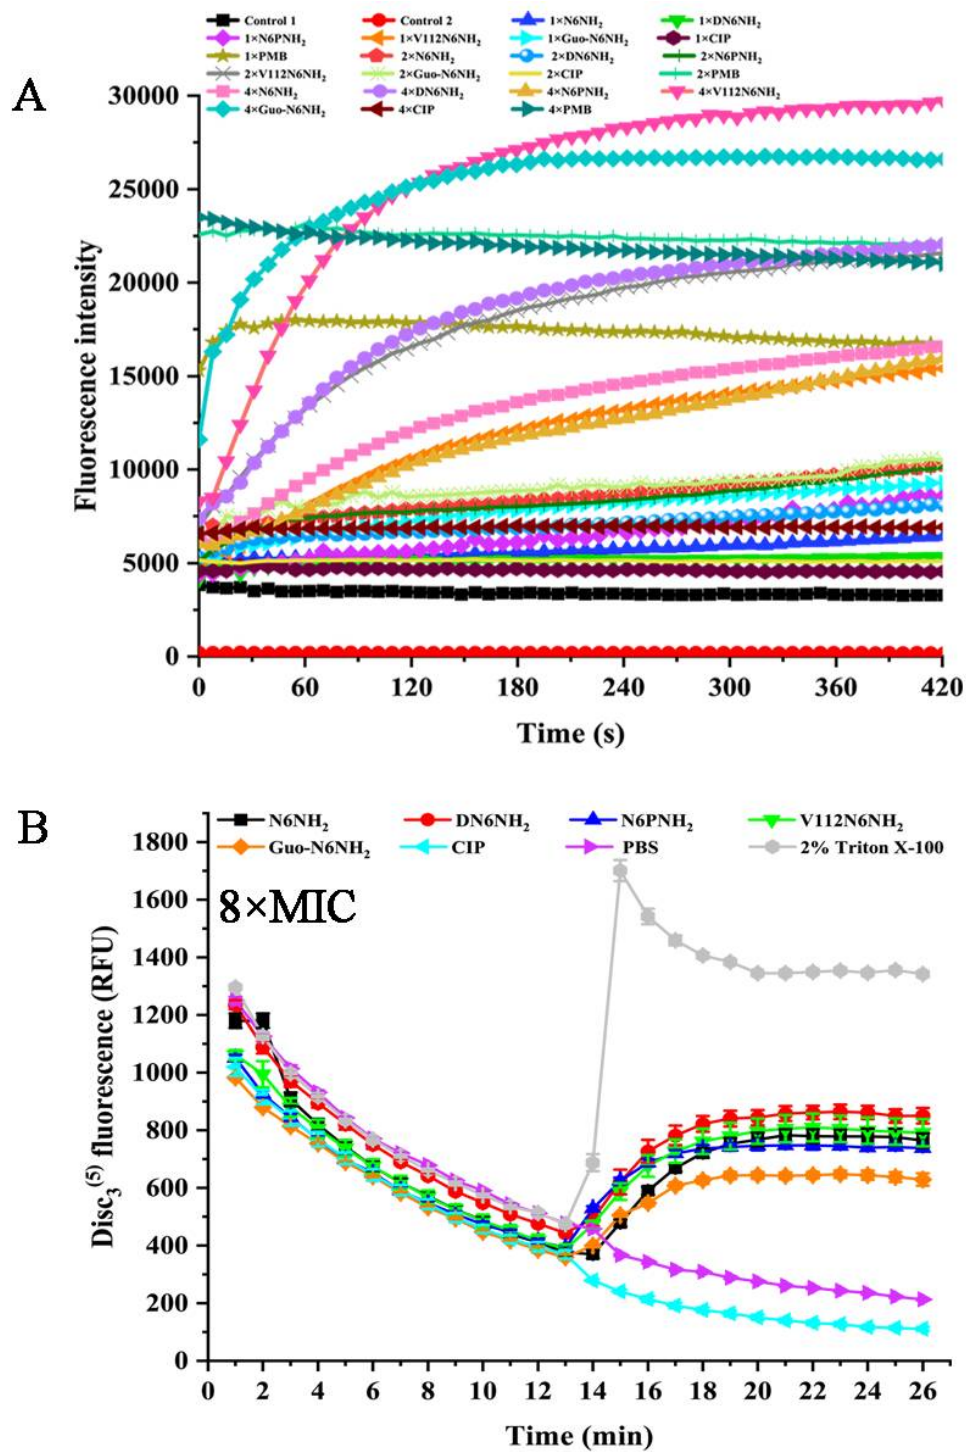

**Figure S6-1.** Interaction of N6NH<sub>2</sub> and its analogues with cell membrane. (A) N6NH<sub>2</sub> and its analogues outer membrane penetration test. (B) Effects of 8×MIC N6NH<sub>2</sub> and its analogues on bacterial cytoplasmic membrane potential.

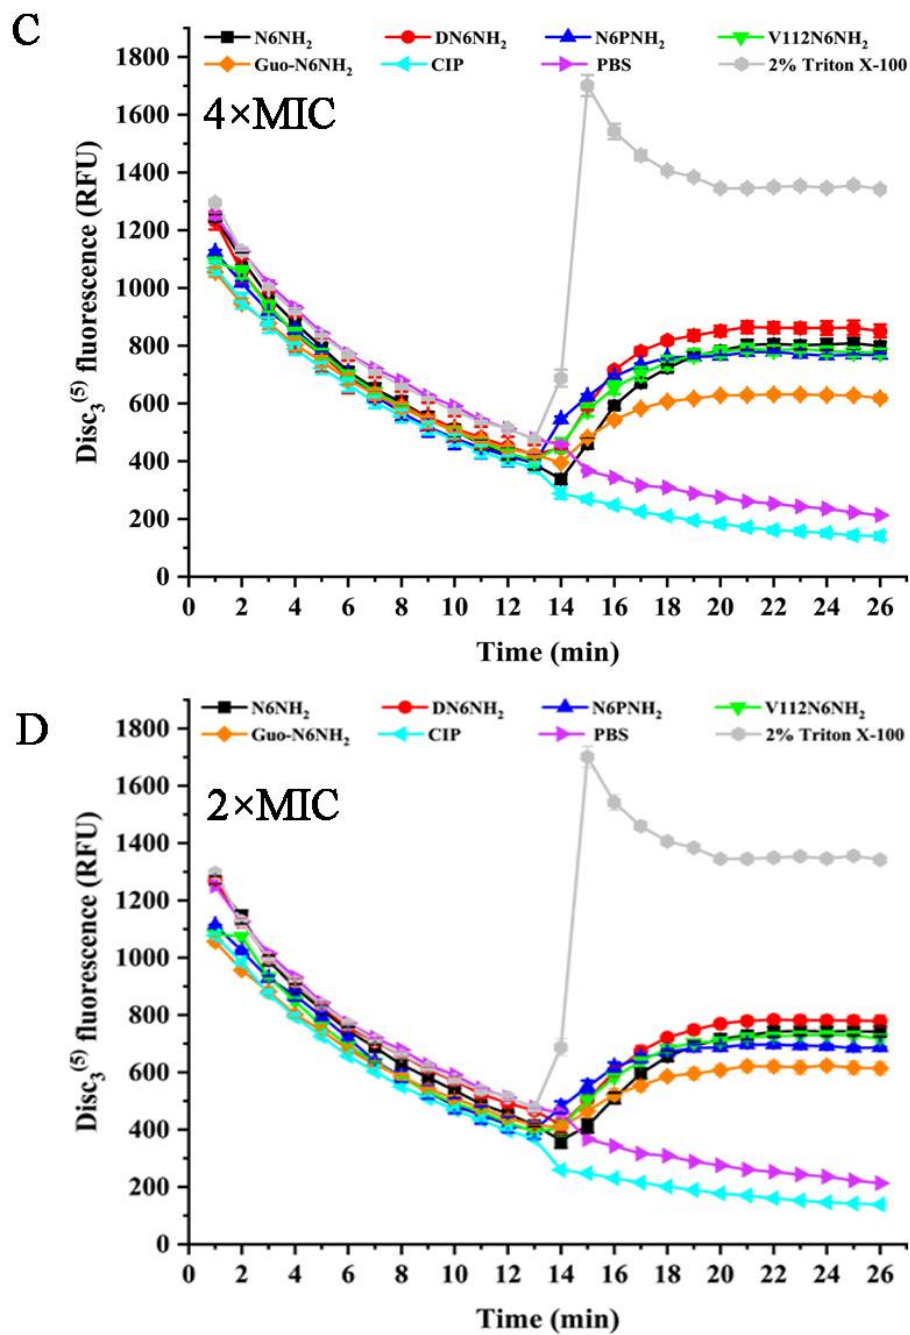

**Figure S6-2.** Interaction of N6NH<sub>2</sub> and its analogues with cell membrane. (C-D) Effects of 4×MIC or 2×MIC N6NH<sub>2</sub> and its analogues on bacterial cytoplasmic membrane potential.

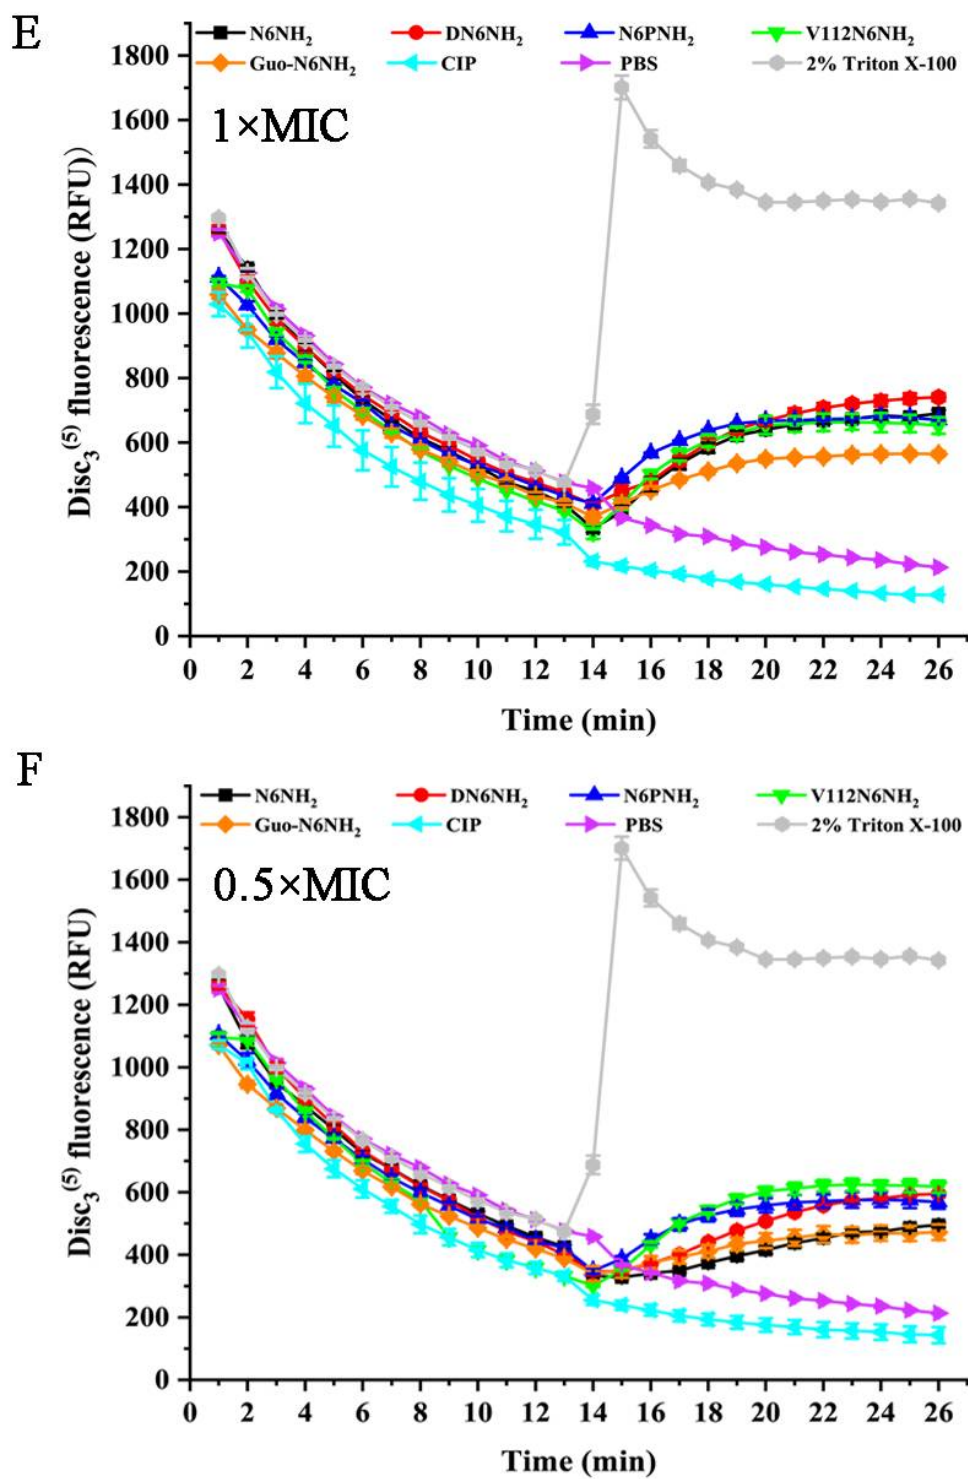

**Figure S6-3.** Interaction of N6NH<sub>2</sub> and its analogues with cell membrane. (E-F) Effects of 1×MIC or 0.5×MIC N6NH<sub>2</sub> and its analogues on bacterial cytoplasmic membrane potential.

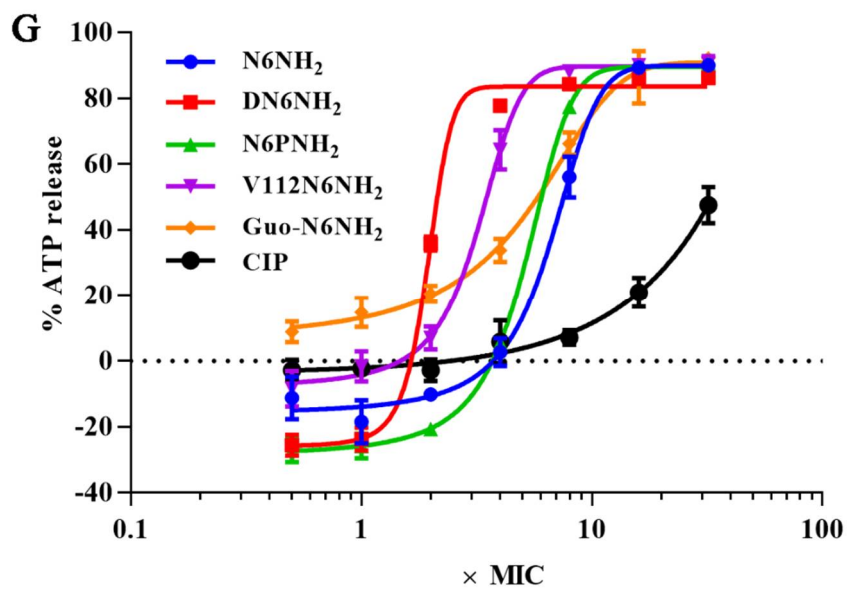

Figure S6-4. Interaction of N6NH<sub>2</sub> and its analogues with cell membrane. (G) Extracellular ATP release.

**A**

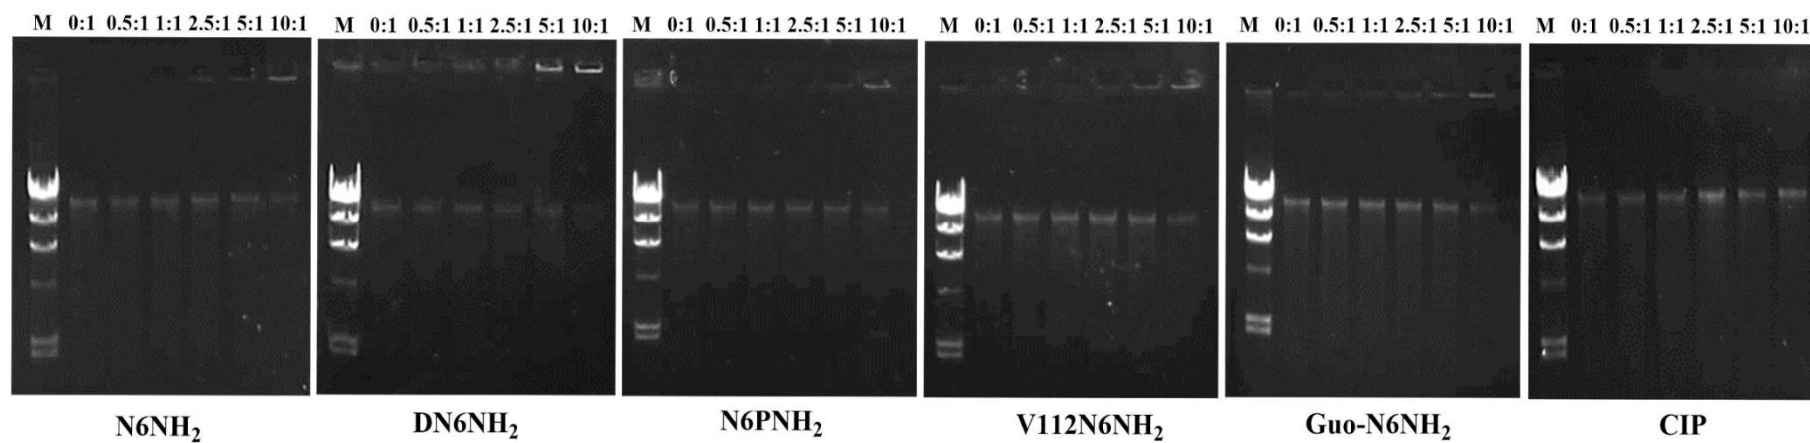

**Figure S7-1.** Interaction of N6NH<sub>2</sub> and its analogues with genomic DNA. (A) Gel block analysis of interaction between N6NH<sub>2</sub> analogues and genomic DNA of *A. veronii* ACCC61732.



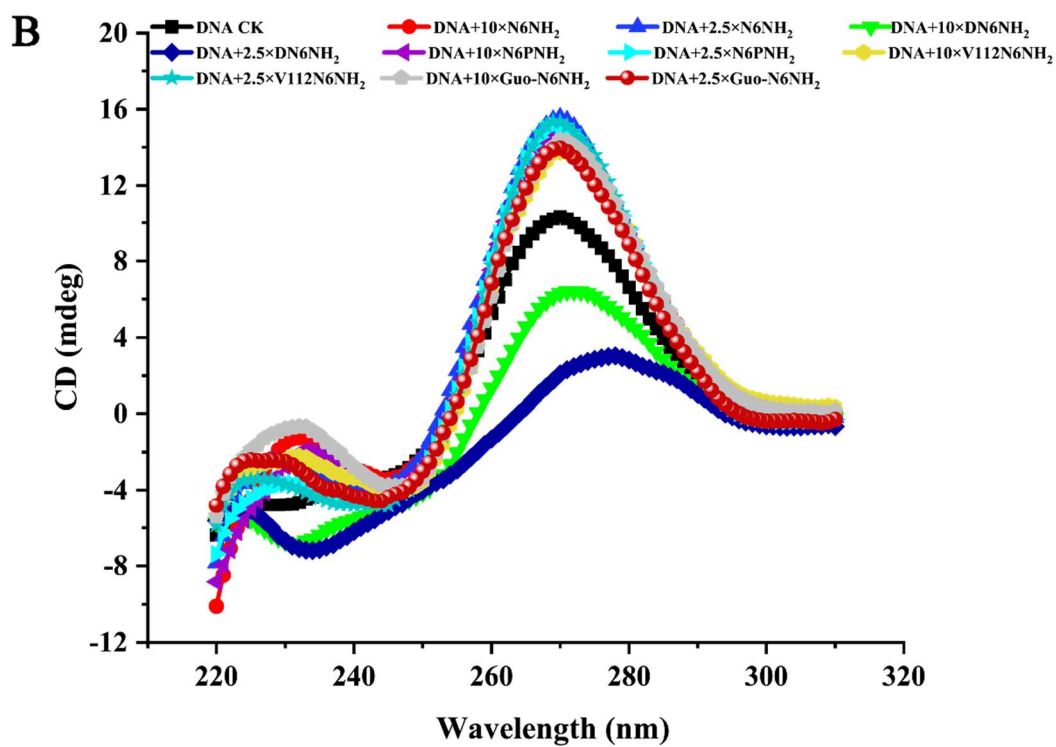

**Figure S7-2.** Interaction of N6NH<sub>2</sub> and its analogues with genomic DNA. **(B)** CD analysis of the effect of N6NH<sub>2</sub> and its analogues on DNA structure.

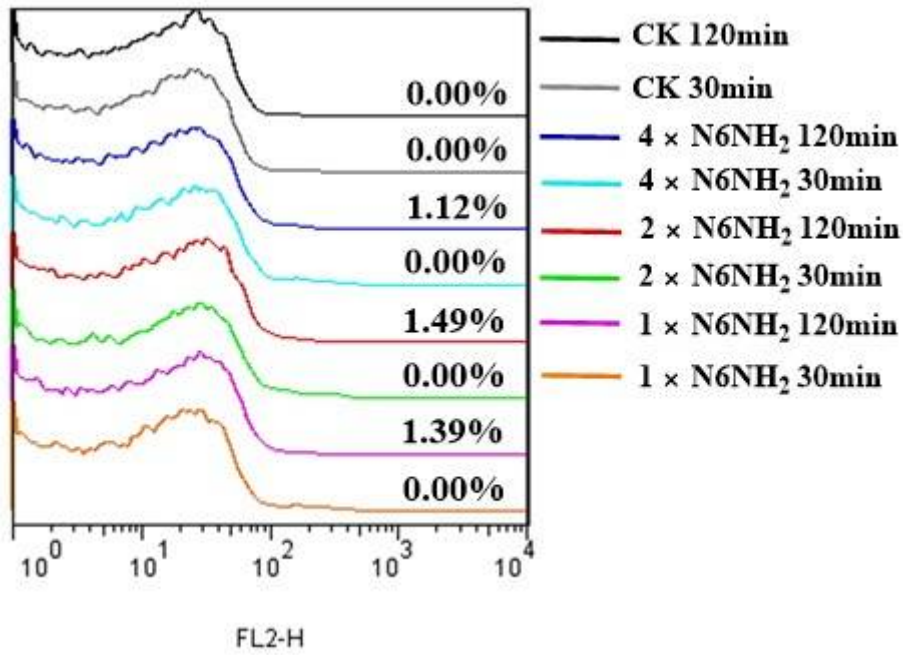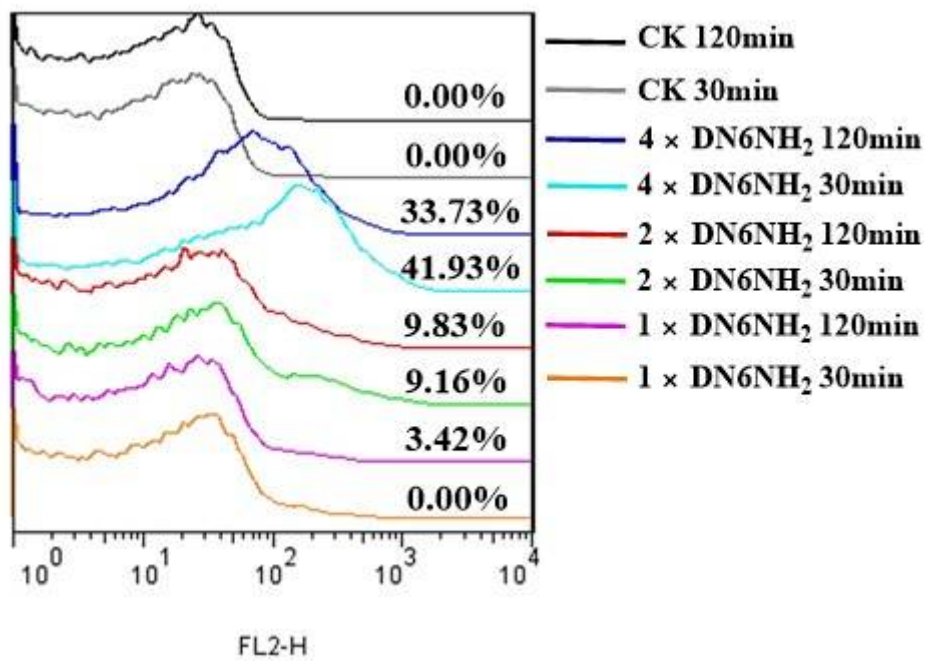

**Figure S8-1.** FACS analysis of the membrane penetration capacity of N6NH<sub>2</sub> and DN6NH<sub>2</sub> against *A. veronii* ATCC61732.

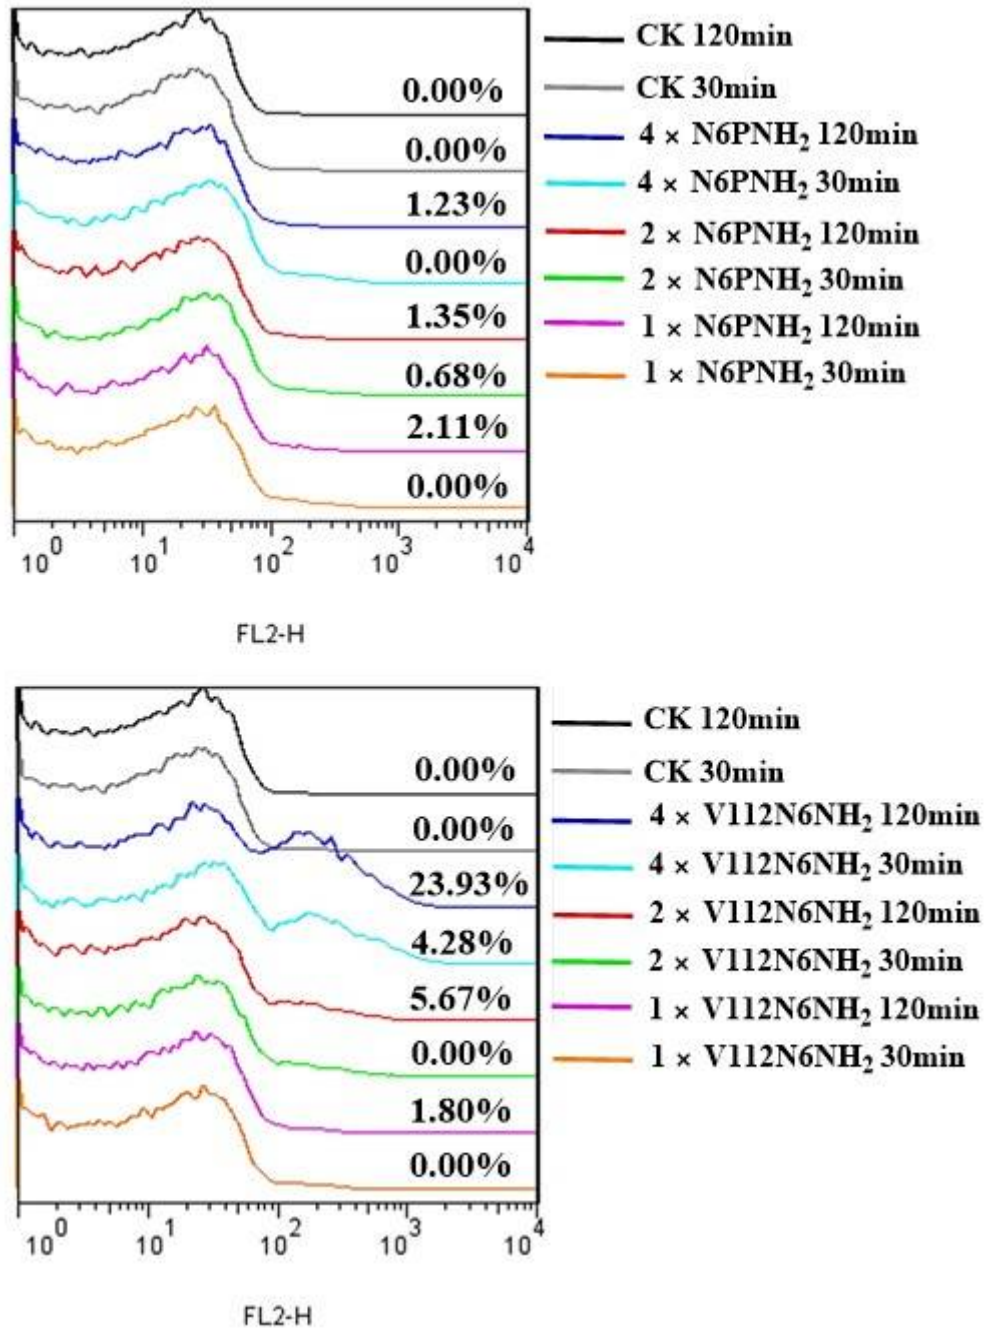

**Figure S8-2.** FACS analysis of the membrane penetration capacity of N6PNH<sub>2</sub> and V112N6NH<sub>2</sub> against *A. veronii* ATCC61732.

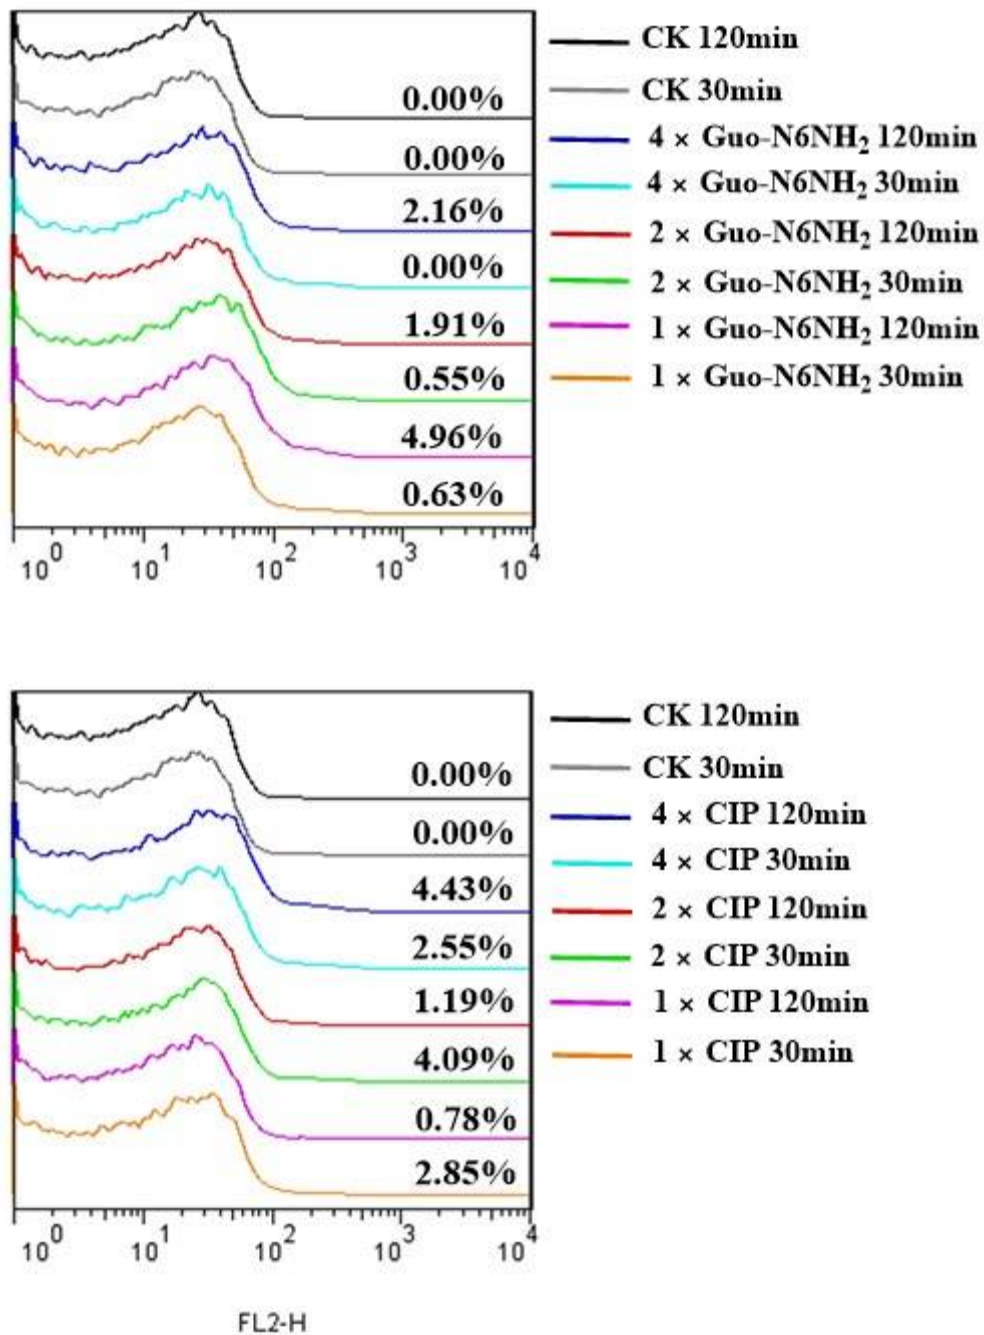

**Figure S8-3.** FACS analysis of the membrane penetration capacity of Guo-N6NH<sub>2</sub> and CIP against *A. veronii* ATCC61732.

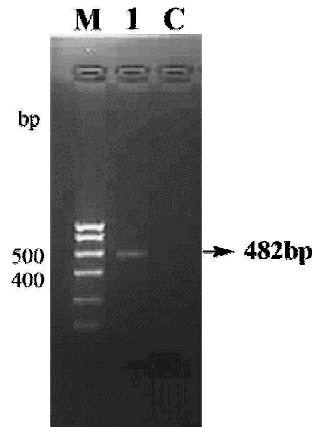

**Figure S9.** Identification of *vac J* gene of *A. veronii* ACCC61732. Lane M: *Trans* DNA Marker I. Lanes 1: *vacJ* gene. Lane C: negative control.

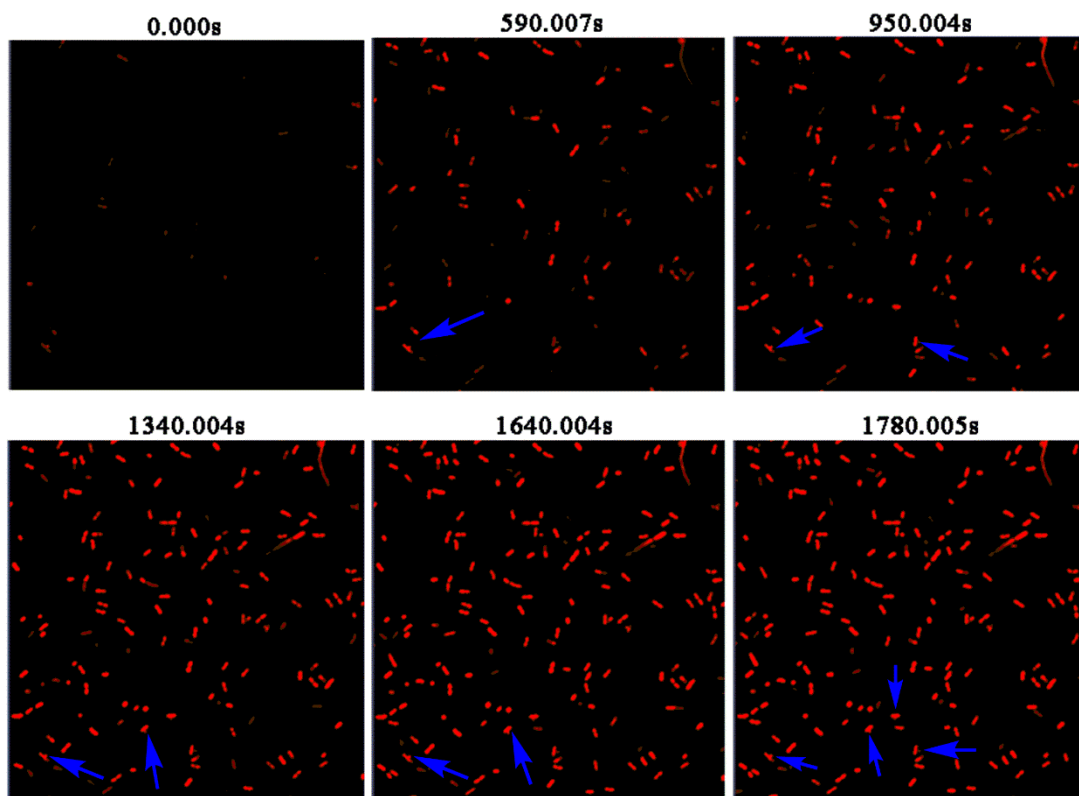

**Figure S10.** Outer membrane vesicles (OMVs) of *A. veronii* ACCC61732 treated with V112N6NH<sub>2</sub>. The cells were observed using CLSM.

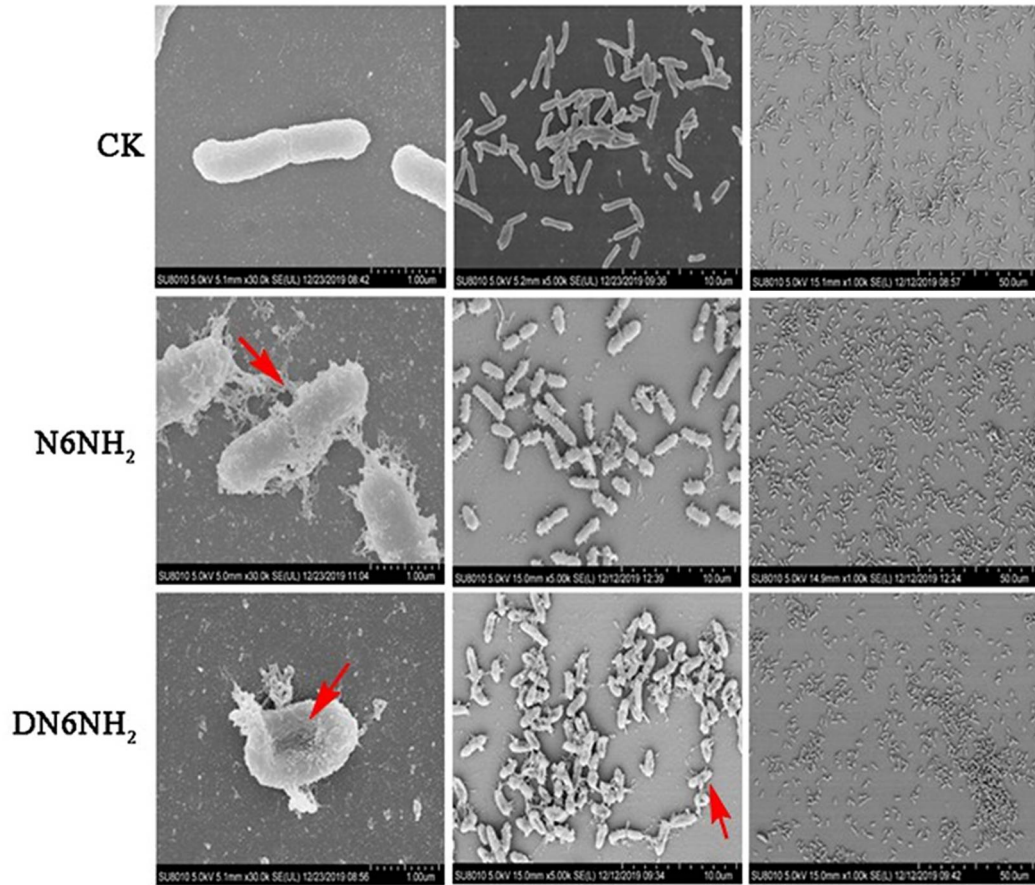

Figure S11-1. Effects of N6NH<sub>2</sub> or DN6NH<sub>2</sub> on biofilms of *A. veronii* ACCC61732 by using SEM.

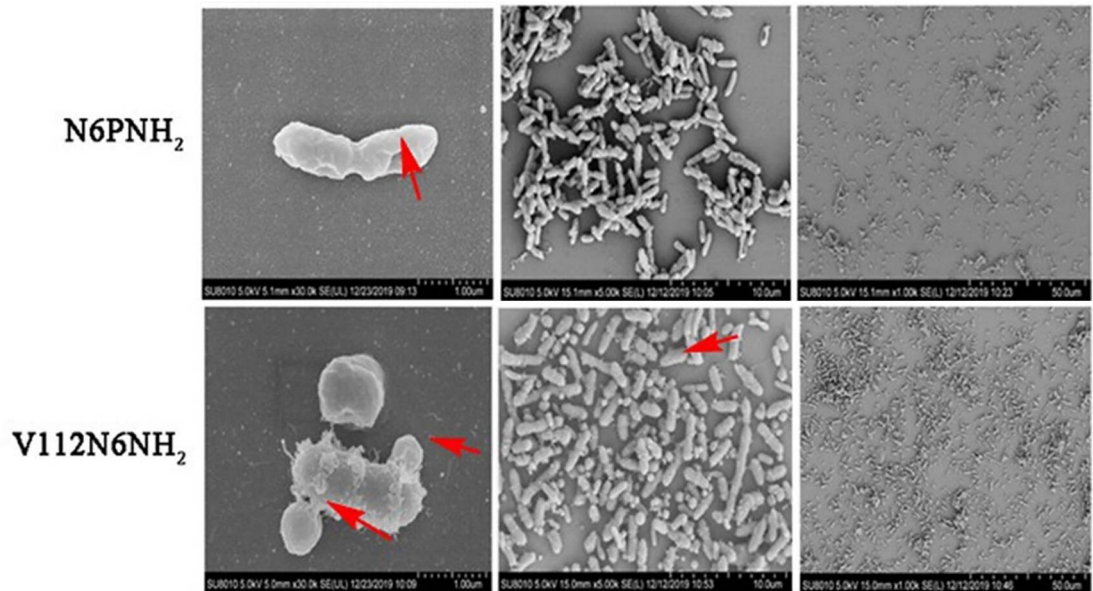

Figure S11-2. Effects of N6PNH<sub>2</sub> or V112N6NH<sub>2</sub> on biofilms of *A. veronii* ACCC61732 by using SEM.

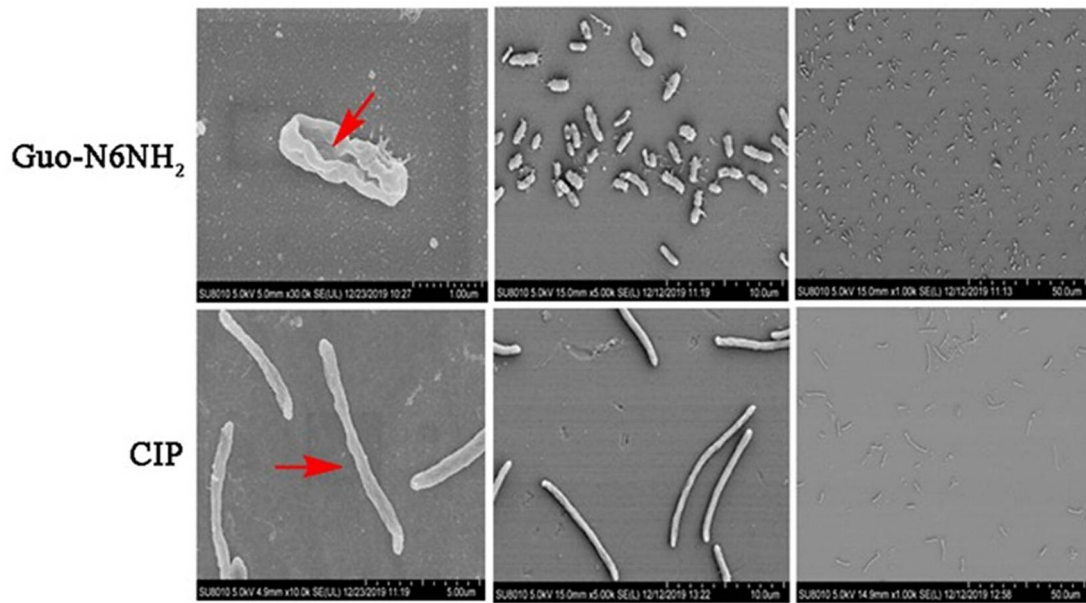

Figure S11-3. Effects of Guo-N6NH<sub>2</sub> or CIP on biofilms of *A. veronii* ACCC61732 by using SEM.

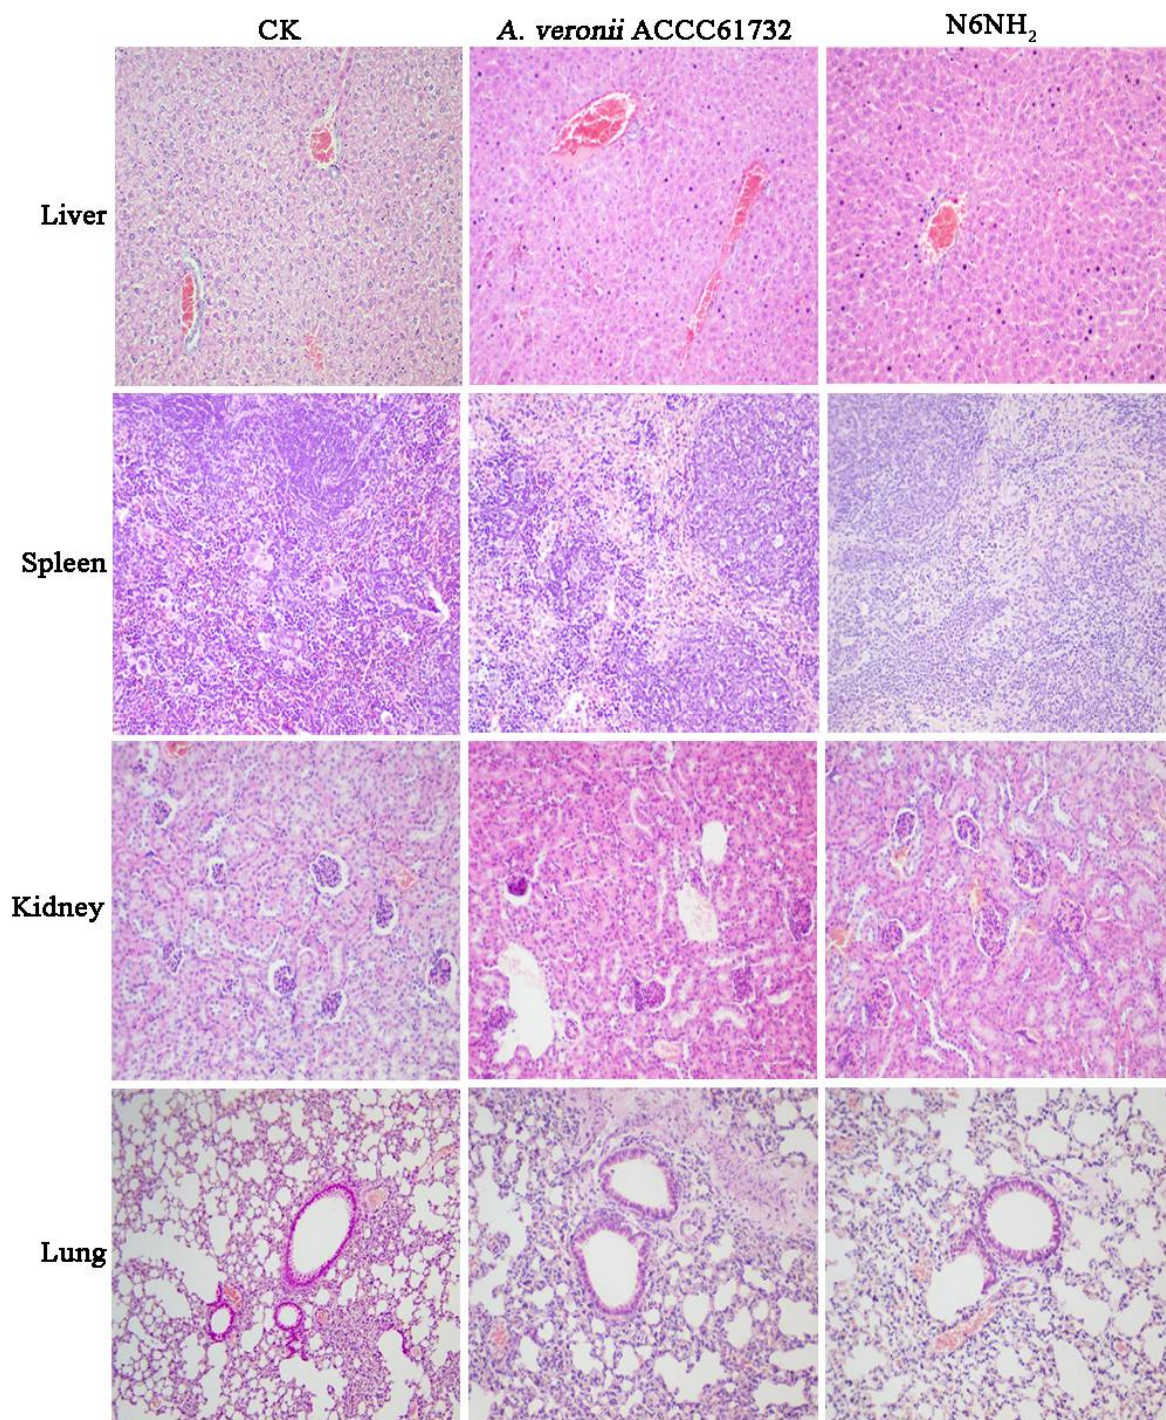

**Figure S12-1.** Effects of N6NH<sub>2</sub> and its analogues on organ injury in mice. Mice were infected intraperitoneally with *A. veronii* ACCC61732 ( $6 \times 10^8$  CFU/mL, 200  $\mu$ L) and treated with N6NH<sub>2</sub> (5  $\mu$ mol/kg). The livers, spleens, kidneys and lungs were harvested from mice sacrificed at 24 h after infection.



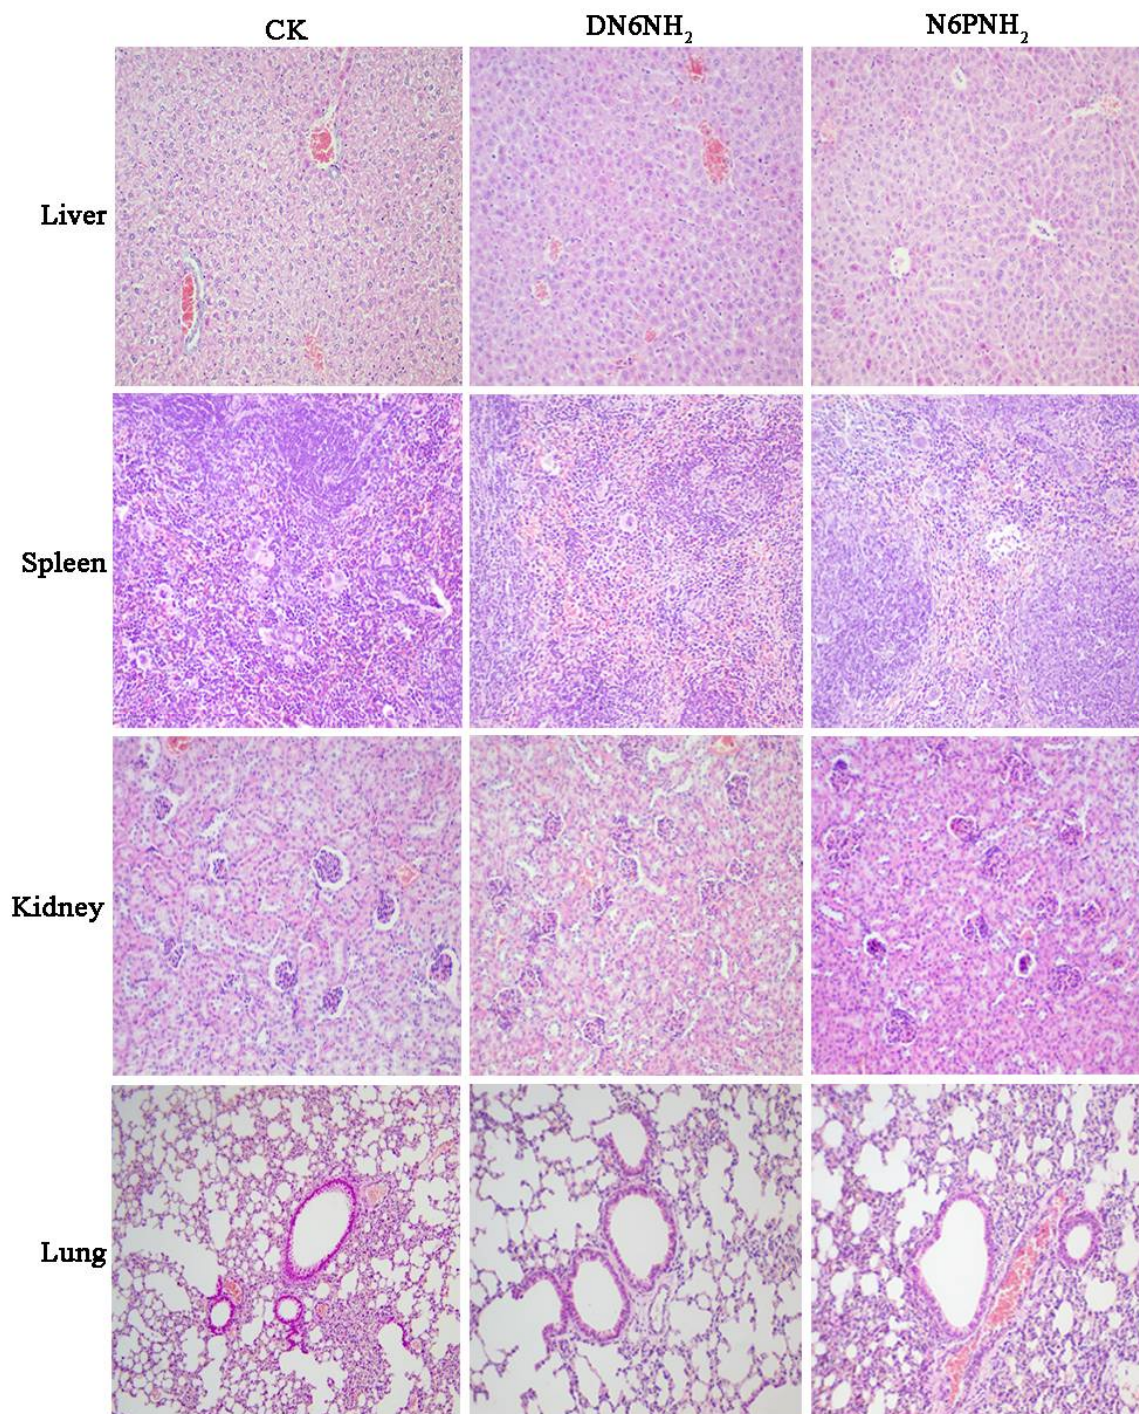

**Figure S12-2.** Effects of N6NH<sub>2</sub> and its analogues on organ injury in mice. Mice were infected intraperitoneally with *A. veronii* ACCC61732 ( $6 \times 10^8$  CFU/mL, 200  $\mu$ L) and treated with DN6NH<sub>2</sub> and N6PNH<sub>2</sub> (5  $\mu$ mol/kg). The livers, spleens, kidneys and lungs were harvested from mice sacrificed at 24 h after infection.

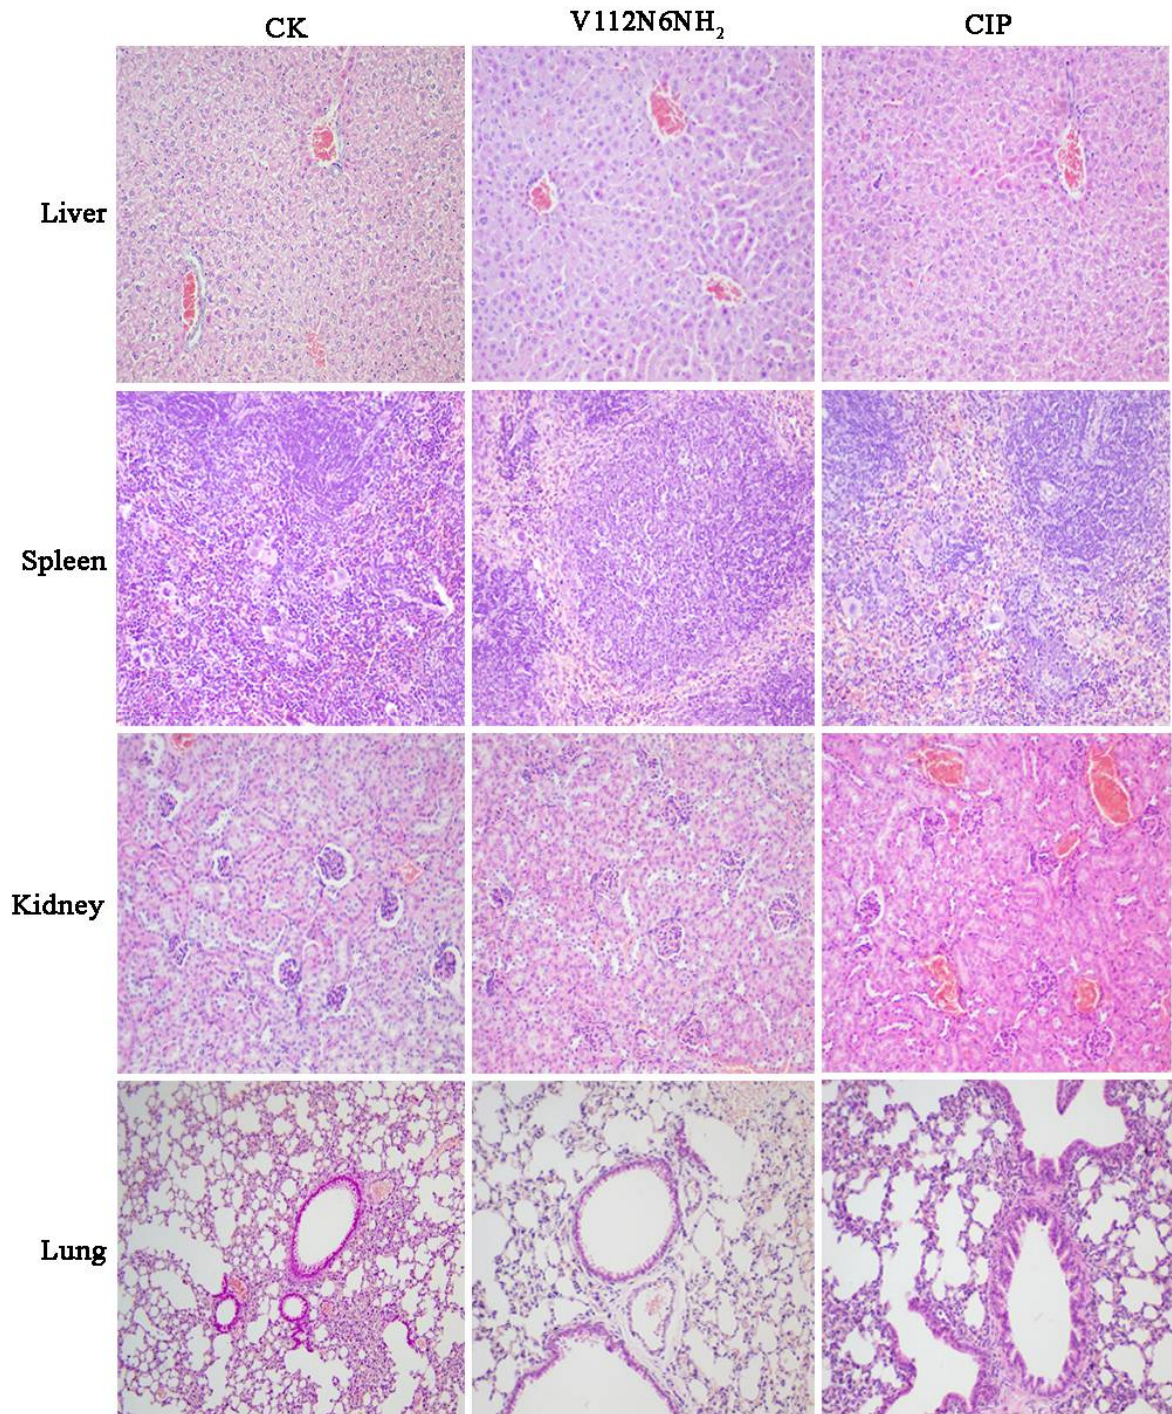

**Figure S12-3.** Effects of N6NH<sub>2</sub> and its analogues on organ injury in mice. Mice were infected intraperitoneally with *A. veronii* ACCC61732 ( $6 \times 10^8$  CFU/mL, 200  $\mu$ L) and treated with V112N6NH<sub>2</sub> (5  $\mu$ mol/kg) and CIP (1  $\mu$ mol/kg). The livers, spleens, kidneys and lungs were harvested from mice sacrificed at 24 h after infection.

**Table S1.** Synergism of N6NH<sub>2</sub> analogues and antibiotics.

| Combination             | Variety                 | <i>A. veronii</i> ACCC61732              |                                          |           |                    |
|-------------------------|-------------------------|------------------------------------------|------------------------------------------|-----------|--------------------|
|                         |                         | MIC <sup>a</sup><br>( $\mu\text{g/mL}$ ) | MIC <sup>c</sup><br>( $\mu\text{g/mL}$ ) | FIC       | FICI               |
| N6NH <sub>2</sub> -CIP  | N6NH <sub>2</sub> +CIP  | 4+0.125                                  | 4+0.0078                                 | 1+ 0.0625 | 1.0625             |
| N6NH <sub>2</sub> -OFX  | N6NH <sub>2</sub> +OFX  | 4+0.25                                   | 4+0.0156                                 | 1+ 0.0625 | 1.0625             |
| N6NH <sub>2</sub> -NOR  | N6NH <sub>2</sub> +NOR  | 4+0.5                                    | 4+0.5                                    | 1+1       | 2                  |
| N6NH <sub>2</sub> -ENRO | N6NH <sub>2</sub> +ENRO | 4+0.25                                   | 4+0.25                                   | 1+1       | 2                  |
| N6NH <sub>2</sub> -RIF  | N6NH <sub>2</sub> +RIF  | 16+0.5                                   | 8+0.125                                  | 0.5+0.25  | 0.75 <sup>b</sup>  |
| N6NH <sub>2</sub> -VAN  | N6NH <sub>2</sub> +VAN  | 16+16                                    | 16+1                                     | 1+0.0625  | 1.0625             |
| N6NH <sub>2</sub> -PMB  | N6NH <sub>2</sub> +PMB  | 16+8                                     | 8+2                                      | 0.25+0.25 | 0.5 <sup>a</sup>   |
| N6NH <sub>2</sub> -STRE | N6NH <sub>2</sub> +STRE | 16+64                                    | 8+32                                     | 0.5+0.5   | 1 <sup>b</sup>     |
| N6NH <sub>2</sub> -DOXY | N6NH <sub>2</sub> +DOXY | 16+1                                     | 8+0.5                                    | 0.5+0.5   | 1 <sup>b</sup>     |
| N6NH <sub>2</sub> -KANA | N6NH <sub>2</sub> +KANA | 16+8                                     | 8+0.5                                    | 0.5+0.125 | 0.625 <sup>b</sup> |
| N6NH <sub>2</sub> -CHLO | N6NH <sub>2</sub> +CHLO | 16+0.25                                  | 16+0.0156                                | 1+0.625   | 1.0625             |

**Note:** MIC<sup>a</sup> indicates the MIC of drug used alone; MIC<sup>c</sup> indicates the MIC of drug used in combination; <sup>a</sup>Synergic effect.; <sup>b</sup>Additive effect; CIP: ciprofloxacin; OFX: ofloxacin; NOR: norfloxacin; ENRO: enrofloxacin; RIF: rifampicin; VAN: vancomycin; PMB: polymyxin B; STRE: streptomycin sulfate; DOXY: doxycycline hyclate; KANA: kanamycin sulfate; CHLO: chloramphenicol.

**Table S2.** Synergism of DN6NH<sub>2</sub> and antibiotics.

| Combination              | Variety                  | <i>A. veronii</i> ACCC61732           |                                       |           |                    |
|--------------------------|--------------------------|---------------------------------------|---------------------------------------|-----------|--------------------|
|                          |                          | MIC <sup>a</sup> ( $\mu\text{g/mL}$ ) | MIC <sup>c</sup> ( $\mu\text{g/mL}$ ) | FIC       | FICI               |
| DN6NH <sub>2</sub> -CIP  | DN6NH <sub>2</sub> +CIP  | 4+0.125                               | 4+0.0078                              | 1+0.0625  | 1.0625             |
| DN6NH <sub>2</sub> -OFX  | DN6NH <sub>2</sub> +OFX  | 4+0.25                                | 4+0.0078                              | 1+0.0625  | 1.0625             |
| DN6NH <sub>2</sub> -NOR  | DN6NH <sub>2</sub> +NOR  | 4+0.5                                 | 2+0.0625                              | 0.5+0.125 | 0.625 <sup>b</sup> |
| DN6NH <sub>2</sub> -ENRO | DN6NH <sub>2</sub> +ENRO | 4+0.25                                | 1+0.25                                | 0.25+1    | 1.25               |
| DN6NH <sub>2</sub> -RIF  | DN6NH <sub>2</sub> +RIF  | 4+0.5                                 | 2+0.25                                | 0.5+0.5   | 1 <sup>b</sup>     |
| DN6NH <sub>2</sub> -VAN  | DN6NH <sub>2</sub> +VAN  | 4+16                                  | 4+1                                   | 1+0.0625  | 1.0625             |
| DN6NH <sub>2</sub> -PMB  | DN6NH <sub>2</sub> +PMB  | 4+8                                   | 4+0.5                                 | 1+0.0625  | 1.0625             |
| DN6NH <sub>2</sub> -STRE | DN6NH <sub>2</sub> +STRE | 4+64                                  | 2+8                                   | 0.5+0.125 | 0.625 <sup>b</sup> |
| DN6NH <sub>2</sub> -DOXY | DN6NH <sub>2</sub> +DOXY | 4+1                                   | 4+0.0625                              | 1+0.0625  | 1.0625             |
| DN6NH <sub>2</sub> -KANA | DN6NH <sub>2</sub> +KANA | 4+8                                   | 2+1                                   | 0.5+0.125 | 0.625 <sup>b</sup> |
| DN6NH <sub>2</sub> -CHLO | DN6NH <sub>2</sub> +CHLO | 4+0.25                                | 4+0.0156                              | 1+0.625   | 1.0625             |

**Note:** MIC<sup>a</sup> indicates the MIC of drug used alone; MIC<sup>c</sup> indicates the MIC of drug used in combination; <sup>b</sup>Additive effect; CIP: ciprofloxacin; OFX: ofloxacin; NOR: norfloxacin; ENRO: enrofloxacin; RIF: rifampicin; VAN: vancomycin; PMB: polymyxin B; STRE: streptomycin sulfate; DOXY: doxycycline hyclate; KANA: kanamycin sulfate; CHLO: chloramphenicol.

**Table S3.** Synergism of N6PNH<sub>2</sub> and antibiotics.

| Combination              | Variety                  | <i>A. veronii</i> ACCC61732 |                          |          |                |
|--------------------------|--------------------------|-----------------------------|--------------------------|----------|----------------|
|                          |                          | MIC <sup>a</sup> (µg/mL)    | MIC <sup>c</sup> (µg/mL) | FIC      | FICI           |
| N6PNH <sub>2</sub> -CIP  | N6PNH <sub>2</sub> +CIP  | 16+0.125                    | 16+0.0078                | 1+0.0625 | 1.0625         |
| N6PNH <sub>2</sub> -OFX  | N6PNH <sub>2</sub> +OFX  | 16+0.25                     | 16+0.0156                | 1+0.0625 | 1.0625         |
| N6PNH <sub>2</sub> -NOR  | N6PNH <sub>2</sub> +NOR  | 16+0.5                      | 16+0.0313                | 1+0.0625 | 1.0625         |
| N6PNH <sub>2</sub> -ENRO | N6PNH <sub>2</sub> +ENRO | 16+0.25                     | 16+0.0156                | 1+0.0625 | 1.0625         |
| N6PNH <sub>2</sub> -RIF  | N6PNH <sub>2</sub> +RIF  | 16+0.5                      | 8+0.25                   | 0.5+0.5  | 1 <sup>b</sup> |
| N6PNH <sub>2</sub> -VAN  | N6PNH <sub>2</sub> +VAN  | 16+16                       | 16+1                     | 1+0.0625 | 1.0625         |
| N6PNH <sub>2</sub> -PMB  | N6PNH <sub>2</sub> +PMB  | 16+8                        | 8+4                      | 0.5+0.5  | 1 <sup>b</sup> |
| N6PNH <sub>2</sub> -STRE | N6PNH <sub>2</sub> +STRE | 16+64                       | 16+4                     | 1+0.0625 | 1.0625         |
| N6PNH <sub>2</sub> -DOXY | N6PNH <sub>2</sub> +DOXY | 16+1                        | 16+0.0625                | 1+0.0625 | 1.0625         |
| N6PNH <sub>2</sub> -KANA | N6PNH <sub>2</sub> +KANA | 16+8                        | 16+0.5                   | 1+0.0625 | 1.0625         |
| N6PNH <sub>2</sub> -CHLO | N6PNH <sub>2</sub> +CHLO | 16+0.25                     | 16+0.0156                | 1+0.625  | 1.0625         |

**Note:** MIC<sup>a</sup> indicates the MIC of drug used alone; MIC<sup>c</sup> indicates the MIC of drug used in combination; <sup>b</sup>Additive effect; CIP: ciprofloxacin; OFX: ofloxacin; NOR: norfloxacin; ENRO: enrofloxacin; RIF: rifampicin; VAN: vancomycin; PMB: polymyxin B; STRE: streptomycin sulfate; DOXY: doxycycline hyclate; KANA: kanamycin sulfate; CHLO: chloramphenicol.

**Table S4.** Synergism of V112N6NH<sub>2</sub> and antibiotics.

| Combination                 | Variety                     | <i>A. veronii</i> ACCC61732 |                          |            |                     |
|-----------------------------|-----------------------------|-----------------------------|--------------------------|------------|---------------------|
|                             |                             | MIC <sup>a</sup> (µg/mL)    | MIC <sup>c</sup> (µg/mL) | FIC        | FICI                |
| V112N6NH <sub>2</sub> -CIP  | V112N6NH <sub>2</sub> +CIP  | 16+0.125                    | 16+0.0078                | 1+0.0625   | 1.0625              |
| V112N6NH <sub>2</sub> -OFX  | V112N6NH <sub>2</sub> +OFX  | 16+0.25                     | 16+0.0156                | 1+0.0625   | 1.0625              |
| V112N6NH <sub>2</sub> -NOR  | V112N6NH <sub>2</sub> +NOR  | 16+0.5                      | 16+0.0625                | 1+0.125    | 1.125               |
| V112N6NH <sub>2</sub> -ENRO | V112N6NH <sub>2</sub> +ENRO | 16+0.25                     | 16+0.0156                | 1+0.0625   | 1.0625              |
| V112N6NH <sub>2</sub> -RIF  | V112N6NH <sub>2</sub> +RIF  | 16+0.0625                   | 16+0.0313                | 1+0.0625   | 1.0625              |
| V112N6NH <sub>2</sub> -VAN  | V112N6NH <sub>2</sub> +VAN  | 16+16                       | 16+1                     | 1+0.0625   | 1.0625              |
| V112N6NH <sub>2</sub> -PMB  | V112N6NH <sub>2</sub> +PMB  | 16+8                        | 1+4                      | 0.0625+0.5 | 0.5625 <sup>b</sup> |
| V112N6NH <sub>2</sub> -STRE | V112N6NH <sub>2</sub> +STRE | 16+64                       | 16+4                     | 1+0.0625   | 1.0625              |
| V112N6NH <sub>2</sub> -DOXY | V112N6NH <sub>2</sub> +DOXY | 16+1                        | 16+0.0625                | 1+0.0625   | 1.0625              |
| V112N6NH <sub>2</sub> -KANA | V112N6NH <sub>2</sub> +KANA | 16+8                        | 16+0.5                   | 1+0.0625   | 1.0625              |
| V112N6NH <sub>2</sub> -CHLO | V112N6NH <sub>2</sub> +CHLO | 16+0.25                     | 16+0.0156                | 1+0.0156   | 1.0625              |

**Note:** MIC<sup>a</sup> indicates the MIC of drug used alone; MIC<sup>c</sup> indicates the MIC of drug used in combination; <sup>b</sup>Additive effect; CIP: ciprofloxacin; OFX: ofloxacin; NOR: norfloxacin; ENRO: enrofloxacin; RIF: rifampicin; VAN: vancomycin; PMB: polymyxin B; STRE: streptomycin sulfate; DOXY: doxycycline hyclate; KANA: kanamycin sulfate; CHLO: chloramphenicol.

**Table S5.** Synergism of Guo-N6NH<sub>2</sub> and antibiotics.

| Combination                 | Variety                     | <i>A. veronii</i> ACCC61732 |                          |           |                  |
|-----------------------------|-----------------------------|-----------------------------|--------------------------|-----------|------------------|
|                             |                             | MIC <sup>a</sup> (µg/mL)    | MIC <sup>c</sup> (µg/mL) | FIC       | FICI             |
| Guo-N6NH <sub>2</sub> -CIP  | Guo-N6NH <sub>2</sub> +CIP  | 8+0.125                     | 8+0.0078                 | 1+0.0625  | 1.0625           |
| Guo-N6NH <sub>2</sub> -OFX  | Guo-N6NH <sub>2</sub> +OFX  | 8+0.25                      | 8+0.0156                 | 1+0.0625  | 1.0625           |
| Guo-N6NH <sub>2</sub> -NOR  | Guo-N6NH <sub>2</sub> +NOR  | 8+0.5                       | 4+0.25                   | 0.5+0.5   | 1 <sup>b</sup>   |
| Guo-N6NH <sub>2</sub> -ENRO | Guo-N6NH <sub>2</sub> +ENRO | 8+0.25                      | 8+0.0156                 | 1+ 0.0625 | 1.0625           |
| Guo-N6NH <sub>2</sub> -RIF  | Guo-N6NH <sub>2</sub> +RIF  | 16+0.5                      | 8+0.25                   | 0.5+0.5   | 1 <sup>b</sup>   |
| Guo-N6NH <sub>2</sub> -VAN  | Guo-N6NH <sub>2</sub> +VAN  | 16+16                       | 16+1                     | 1+0.0625  | 1.0625           |
| Guo-N6NH <sub>2</sub> -PMB  | Guo-N6NH <sub>2</sub> +PMB  | 16+8                        | 4+2                      | 0.25+0.25 | 0.5 <sup>a</sup> |
| Guo-N6NH <sub>2</sub> -STRE | Guo-N6NH <sub>2</sub> +STRE | 16+64                       | 8+32                     | 0.5+ 0.5  | 1 <sup>b</sup>   |
| Guo-N6NH <sub>2</sub> -DOXY | Guo-N6NH <sub>2</sub> +DOXY | 16+1                        | 16+0.0625                | 1+ 0.0625 | 1.0625           |
| Guo-N6NH <sub>2</sub> -KANA | Guo-N6NH <sub>2</sub> +KANA | 16+8                        | 16+0.5                   | 1+0.0625  | 1.0625           |
| Guo-N6NH <sub>2</sub> -CHLO | Guo-N6NH <sub>2</sub> +CHLO | 16+0.25                     | 16+0.0156                | 1+ 0.625  | 1.0625           |

**Note:** MIC<sup>a</sup> indicates the MIC of drug used alone; MIC<sup>c</sup> indicates the MIC of drug used in combination; <sup>a</sup>Synergic effect.; <sup>b</sup>Additive effect; CIP: ciprofloxacin; OFX: ofloxacin; NOR: norfloxacin; ENRO: enrofloxacin; RIF: rifampicin; VAN: vancomycin; PMB: polymyxin B; STRE: streptomycin sulfate; DOXY: doxycycline hyclate; KANA: kanamycin sulfate; CHLO: chloramphenicol.

**Table S6.** MIC values of N6NH<sub>2</sub> and its analogues against *A. veronii* ACCC61732 under different conditions.

| Peptide               | Control <sup>a</sup> | Temperature (°C) |    |    |    |    |     | pH value |    |    |    |    | Physiological salt (mM) |     |     |     |     | Enzyme |        |         |              |
|-----------------------|----------------------|------------------|----|----|----|----|-----|----------|----|----|----|----|-------------------------|-----|-----|-----|-----|--------|--------|---------|--------------|
|                       |                      | 4                | 20 | 40 | 60 | 80 | 100 | 2        | 4  | 6  | 8  | 10 | 50                      | 100 | 200 | 300 | 400 | 500    | Pepsin | Trypsin | Proteinase K |
| N6NH <sub>2</sub>     | 4                    | 4                | 4  | 4  | 4  | 4  | 8   | 4        | 4  | 4  | 4  | 4  | 4                       | 4   | 8   | 8   | 8   | 8      | 4      | > 128   | > 128        |
| DN6NH <sub>2</sub>    | 4                    | 4                | 4  | 4  | 4  | 4  | 8   | 2        | 2  | 4  | 4  | 4  | 4                       | 4   | 4   | 4   | 4   | 4      | 4      | 4       | 4            |
| N6PNH <sub>2</sub>    | 16                   | 16               | 16 | 16 | 16 | 16 | 32  | 8        | 16 | 16 | 8  | 8  | 8                       | 8   | 16  | 16  | 16  | 32     | 16     | > 128   | > 128        |
| V112N6NH <sub>2</sub> | 16                   | 16               | 16 | 16 | 16 | 16 | 32  | 16       | 16 | 16 | 16 | 8  | 8                       | 16  | 16  | 16  | 32  | 32     | 16     | > 128   | > 128        |
| Guo-N6NH <sub>2</sub> | 8                    | 8                | 8  | 8  | 8  | 8  | 16  | 8        | 8  | 8  | 4  | 4  | 8                       | 8   | 8   | 8   | 8   | 16     | 8      | > 128   | > 128        |

**Note:** <sup>a</sup>The control MIC values were determined in the absence of these temperature, acid and alkali, physiological salt, and enzyme condition.

**Table S7.** Effects of N6NH<sub>2</sub> and its analogues on inner membrane of *A. veronii* ACCC61732.

| Peptides              | Time (h) | Permeability (%) |         |         |
|-----------------------|----------|------------------|---------|---------|
|                       |          | 1 × MIC          | 2 × MIC | 4 × MIC |
| N6NH <sub>2</sub>     | 0.5      | 0                | 0       | 0       |
|                       | 2        | 1.39             | 1.49    | 1.12    |
| DN6NH <sub>2</sub>    | 0.5      | 0                | 9.16    | 41.93   |
|                       | 2        | 3.42             | 9.83    | 33.73   |
| N6PNH <sub>2</sub>    | 0.5      | 0                | 0.68    | 0       |
|                       | 2        | 2.11             | 1.35    | 1.23    |
| V112N6NH <sub>2</sub> | 0.5      | 0                | 0       | 4.28    |
|                       | 2        | 1.8              | 5.67    | 23.93   |
| Guo-N6NH <sub>2</sub> | 0.5      | 0.63             | 0.55    | 0       |
|                       | 2        | 4.96             | 1.91    | 2.16    |
| CIP                   | 0.5      | 2.85             | 4.09    | 2.55    |
|                       | 2        | 0.78             | 1.19    | 4.43    |

**Table S8.** Primers of the *vacJ* gene.

| Primer       | Sequence (5'→3')    | Product (bp) |
|--------------|---------------------|--------------|
| <i>vacJF</i> | AGTGGTACATGCCTATGC  | 482          |
| <i>vacJR</i> | GGTAGAAGTCCTTGGTCAG |              |
